1 **Inflammatory response in hematopoietic stem and progenitor cells**  
2 **triggered by activating SHP2 mutations potentiates**  
3 **leukemogenesis**

4 Maja Solman<sup>1</sup>, Sasja Blokzijl-Franke<sup>1,\*</sup>, Florian Piques<sup>2,3,\*</sup>, Chuan Yan<sup>4,5,6,7</sup>, Qiqi  
5 Yang<sup>4,5,6,7</sup>, Marion Strullu<sup>2,8</sup>, Sarah M. Kamel<sup>1</sup>, Pakize Ak<sup>1</sup>, Jeroen Bakkers<sup>1,9</sup>, David  
6 M. Langenau<sup>4,5,6,7</sup>, H el ene Cav e<sup>2,3</sup>, Jeroen den Hertog<sup>1,10,#</sup>

7 <sup>1</sup> Hubrecht Institute-KNAW and UMC Utrecht, 3584 CT Utrecht, the Netherlands

8 <sup>2</sup> INSERM UMR\_S1131, Institut de Recherche Saint-Louis, University of Paris, Paris,  
9 France

10 <sup>3</sup> Assistance Publique des H opitaux de Paris AP-HP, H opital Robert Debr e,  
11 D epartement de G en etique, Paris, France

12 <sup>4</sup> Molecular Pathology Unit, Massachusetts General Hospital Research Institute,  
13 Charlestown, MA 02129, United States of America

14 <sup>5</sup> Massachusetts General Hospital Cancer Center, Charlestown, MA 02129, United  
15 States of America

16 <sup>6</sup> Center for Regenerative Medicine, Massachusetts General Hospital, Boston, MA  
17 02114, United States of America

18 <sup>7</sup> Harvard Stem Cell Institute, Cambridge, MA 02139, United States of America

19 <sup>8</sup> Assistance Publique des H opitaux de Paris AP-HP, H opital Robert Debr e, Service  
20 d'Onco-H ematologie P diatrique, Paris, France

21 <sup>9</sup>Department of Medical Physiology, Division of Heart and Lungs, UMC Utrecht,  
22 3584 CX Utrecht, the Netherlands

23 <sup>10</sup> Institute of Biology Leiden, Leiden University, 2333 BE Leiden, The Netherlands

24

25 \* These authors contributed equally

26 # **Jeroen den Hertog, Address:** Hubrecht Institute-KNAW and UMC Utrecht, 3584  
27 CT Utrecht, the Netherlands, **Telephone:** +31 30 212 1800, **Email:**

28 [j.denhertog@hubrecht.eu](mailto:j.denhertog@hubrecht.eu)

## 29 **Abstract**

30 Activating mutations in the protein-tyrosine phosphatase SHP2 are the most  
31 frequently occurring mutations in juvenile myelomonocytic leukemia (JMML) and  
32 JMML-like myeloproliferative neoplasm (MPN) associated with Noonan syndrome  
33 (NS). Hematopoietic stem and progenitor cells (HSPCs) are the disease propagating  
34 cells of JMML. Here, we explored transcriptomes of HSPCs with Shp2 mutations  
35 derived from JMML patients and a novel NS zebrafish model. In addition to major NS  
36 traits, CRISPR/Cas9 knock-in Shp2<sup>D61G</sup> mutant zebrafish recapitulated a JMML-like  
37 MPN phenotype, including myeloid lineage hyperproliferation, *ex vivo* growth of  
38 myeloid colonies and *in vivo* transplantability of HSPCs. Single cell mRNA  
39 sequencing of HSPCs from Shp2<sup>D61G</sup> zebrafish embryos and bulk sequencing of  
40 HSPCs from JMML patients revealed an overlapping inflammatory gene expression  
41 pattern. Strikingly, an anti-inflammatory agent rescued JMML-like MPN in Shp2<sup>D61G</sup>  
42 zebrafish embryos. Our results indicate that a common inflammatory response was  
43 triggered in the HSPCs from sporadic JMML patients and syndromic NS zebrafish,  
44 which potentiated MPN and may represent a future target for JMML therapies.

## 45 Introduction

46 A broad spectrum of germline activating mutations in the tyrosine phosphatase  
47 SHP2, encoded by *PTPN11* has been found to cause Noonan syndrome (NS), a  
48 dominantly inherited developmental disorder from the RASopathy group affecting  
49 1:1,500 individuals. NS is characterized by a systemic impact on development, most  
50 commonly resulting in short stature, congenital heart defects and specific craniofacial  
51 characteristics (Rauen, 2013; Tajan et al., 2018). Somatic activating mutations in  
52 *PTPN11* are the most common cause of sporadic juvenile myelomonocytic leukemia  
53 (JMML), a rare but aggressive myelodysplastic and myeloproliferative neoplasm  
54 (MPN) occurring in young children (Caye et al., 2015; Tartaglia et al., 2003).  
55 Consistently, children with NS are predisposed to developing neonatal MPN, that  
56 either regress without treatment or rapidly progress to JMML leading to early death  
57 (Kratz et al., 2005; Strullu et al., 2014). Previous studies support the view of a strong  
58 endogenous role of germline *PTPN11* mutations in the occurrence of  
59 myeloproliferative complications with the existence of high-risk mutations (Mulero-  
60 Navarro et al., 2015; Strullu et al., 2014). Given the aggressive nature of JMML and  
61 lack of therapies, a better understanding of the elusive JMML(-like MPN)  
62 pathophysiology and development of reliable preclinical models are essential.

63 Several lines of evidence indicate the importance of prenatal hematopoiesis  
64 such as the young age window for both NS-associated and sporadic JMML. The  
65 prenatal origin of *PTPN11* mutations in sporadic JMML suggests that JMML and NS-  
66 associated JMML-like MPN originate from fetal hematopoiesis (Behnert et al., 2021).  
67 Studying SHP2-driven JMML(-like MPN) during fetal hematopoiesis is challenging in  
68 conditional knock-in mouse models of JMML with *PTPN11* mutations, because mutant  
69 SHP2 expression is induced only postnatally (Chan et al., 2009; Xu et al., 2011) or  
70 indolent MPN is induced (Tarnawsky et al., 2017, 2018). NS knock-in mice with  
71 activating *PTPN11* mutations develop mild MPN only after 5 months of age (Araki et  
72 al., 2004, 2009).

73 Zebrafish (*Danio rerio*) with rapid *ex-utero* development, transparent embryos  
74 and conserved blood ontogeny emerged as a unique pediatric leukemia model that  
75 enables monitoring of leukemogenesis from its initial stages with high temporal and  
76 spatial resolution (de Pater & Trompouki, 2018; Gore et al., 2018). Furthermore, NS-  
77 associated features, such as shorter body axis length, craniofacial defects, defective

78 gastrulation and impaired heart looping, are recapitulated in zebrafish embryos upon  
79 transient over-expression of NS-associated protein variants (Bonetti et al., 2014;  
80 Jopling et al., 2007; Niihori et al., 2019; Paardekooper Overman et al., 2014;  
81 Runtuwene et al., 2011).

82 To better assess the link between dysregulated SHP2 and myeloproliferation in  
83 the context of NS, we developed and characterized a novel genetic zebrafish model  
84 of NS with Shp2-D61G mutation, an NS-associated mutation that is most frequently  
85 associated with NS/JMML-like MPN in human patients (Strullu et al., 2014; Tartaglia  
86 et al., 2001). Mutant zebrafish developed hematopoietic defects consistent with JMML-  
87 like MPN. Transcriptomic comparison of HSPCs obtained from JMML patients with  
88 somatic *PTPN11* mutations and HSPCs from mutant zebrafish harboring an NS-  
89 associated variant of Shp2, suggested common mechanisms of disease initiation in  
90 sporadic and syndromic PTPN11-driven JMML. Both data sets show a similar pro-  
91 inflammatory gene expression and an anti-inflammatory agent largely rescued the  
92 hematopoietic defects in mutant zebrafish, suggesting inflammation as potential drug  
93 target for sporadic and syndromic JMML(-like MPN). Our data show that Shp2-mutant  
94 zebrafish convincingly model the human NS-associated MPN thereby providing a  
95 valuable preclinical model for development of future therapies.

## 96 Results

### 97 Shp2<sup>D61G</sup> mutant zebrafish display typical Noonan syndrome traits

98 To investigate early hematopoietic defects associated with NS in a vertebrate  
99 animal model, we turned to zebrafish, which represents a versatile model to study  
100 leukemogenesis and in which it is feasible to introduce mutations at will using  
101 CRISPR/Cas9-mediated homology directed repair (Tessadori et al., 2018). Certain  
102 NS mutations are more frequently associated with NS/JMML-like MPN than others.  
103 The D61G substitution in SHP2 is the most frequently occurring (Strullu et al., 2014;  
104 Tartaglia et al., 2001). Thus, we introduced the D61G mutation in zebrafish Shp2a  
105 using CRISPR/Cas9-mediated homology directed repair (**Supplementary Fig. 1a**),  
106 targeting the *ptpn11a* gene. Sequencing confirmed that the oligonucleotide used for  
107 the homology directed repair was incorporated correctly into the genome (**Fig. 1a**)  
108 and that the introduced mutation did not have a detectable effect on Shp2a protein  
109 expression (**Fig. 1b**). Prior to phenotypic analyses, the mutant lines were outcrossed  
110 twice to ensure that potential background mutations due to the CRISPR/Cas9  
111 approach were removed.

112 In 32% of Shp2<sup>D61G/wt</sup> and 45% of Shp2<sup>D61G/D61G</sup> embryos at 5 days post  
113 fertilization (dpf) we observed typical Noonan syndrome traits, such as reduced body  
114 axis extension, heart edema and face deformities. Based on the extent of the  
115 phenotypes, defects were categorized as normal, mild and severe. (**Fig. 1c,d**). The  
116 observed phenotypic defects were mostly mild, but in some cases severe defects  
117 were found, including severely stunted growth, edemas of the heart and jaw, and  
118 absence of the swim bladder (**Fig. 1c,d**). A more detailed characterization of the  
119 typical NS traits showed that the body axis length was significantly reduced in  
120 Shp2<sup>D61G</sup> mutant embryos at 5dpf (**Fig. 1e**). Furthermore, imaging of Alcian blue  
121 stained cartilage revealed NS-reminiscent craniofacial defects in 4dpf Shp2<sup>D61G</sup>  
122 mutant embryos, characterized by broadening of the head (**Fig. 1f**), leading to an  
123 increased ratio of the width of the ceratohyal and the distance to Meckel's cartilage  
124 (**Fig. 1g**). We also assessed the general morphology and function of the mutant  
125 embryonic hearts. Whole-mount *in situ* hybridization (WISH) with cardiomyocyte  
126 (*myl7*), ventricular (*vhmc*) and atrial (*ahmc*) markers identified no obvious  
127 morphological heart defects, such as changes in heart size or heart looping, as well  
128 as heart chamber specification at 3dpf (**Supplementary Fig. 1b**). A decrease in

129 heart rate (**Fig. 1i**), ejection fraction and cardiac output (**Supplementary Fig. 1c,d**)  
130 was detected from the ventricular kymographs obtained from high speed video  
131 recordings (Tessadori et al., 2012) of the  $Shp2^{D61G}$  mutant hearts at 5dpf (**Fig. 1h**).  
132 Effects on cardiac function varied from embryo to embryo, which is reminiscent of  
133 variable heart defects in human patients.

134 Since most of the embryos with obvious phenotypic defects did not develop a  
135 swim bladder, they did not survive to adulthood. The rest of both  $Shp2^{D61G/wt}$  and  
136  $Shp2^{D61G/D61G}$  mutant zebrafish grew up normally and displayed rather mild defects in  
137 adult stages, such as shorter body axis (**Fig. 1j**), with markedly reduced length  
138 observed from the embryonic stage of 5dpf until the fully developed adults (**Fig. 1k**).  
139 In 10% of  $Shp2^{D61G}$  mutants the phenotypes were more severe, with markedly  
140 reduced body axis length compared to their siblings, skinny appearance and with  
141 overall redness, especially in the head and gill region (**Fig. 1j**).

142 Taken together, the NS  $Shp2^{D61G}$  mutant zebrafish we established  
143 phenocopied several of the typical NS traits, such as stunted growth, craniofacial  
144 defects, and heart defects. Similar to differences in symptoms observed in individual  
145 human patients, the severity of the defects varied among individual  $Shp2^{D61G}$  mutant  
146 zebrafish.

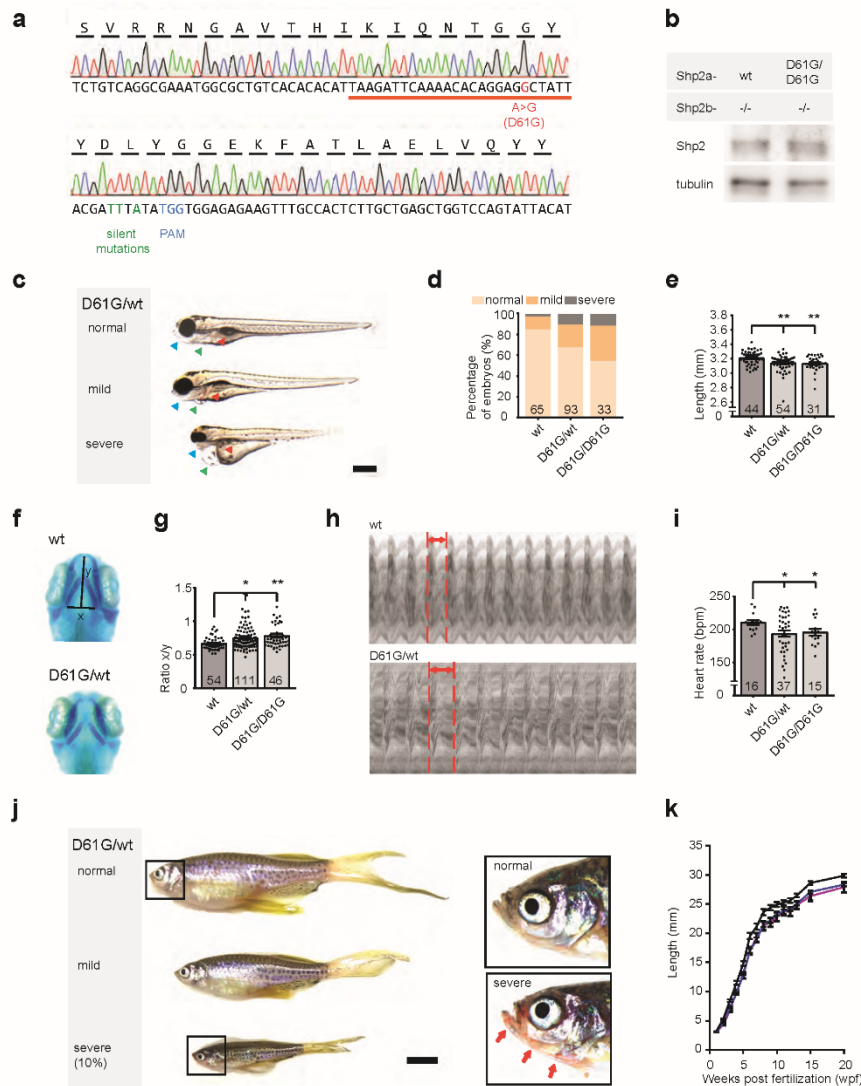

**Figure 1. *Shp2*<sup>D61G</sup> zebrafish display NS-like traits.** **a** Sequencing trace derived from *Shp2*<sup>D61G/D61G</sup> zebrafish. Oligonucleotide sequence used to generate the model is underlined. Nucleotide substitutions for D61G mutation (red), silent mutations close to the PAM site (green) and the PAM site (blue) are indicated. **b** Immunoblot of *Shp2* levels from 5 pooled *Shp2a*<sup>wt</sup>*Shp2b*<sup>-/-</sup> or *Shp2a*<sup>D61G/D61G</sup>*Shp2b*<sup>-/-</sup> embryos using antibodies for *Shp2* and tubulin (loading control). **c** Representative images of typical *Shp2*<sup>D61G</sup> zebrafish embryonic phenotypes at 5dpf. Blue arrows: jaw, green arrows: heart, red arrows: swim bladder. **d** Quantification of phenotypes of *Shp2*<sup>wt</sup>, *Shp2*<sup>D61G/wt</sup> and *Shp2*<sup>D61G/D61G</sup> embryos scored as in **c** normal, mild and severe. **e** Body axis length of *Shp2*<sup>wt</sup>, *Shp2*<sup>D61G/wt</sup> and *Shp2*<sup>D61G/D61G</sup> embryos at 5dpf. **f** Representative images of Alcian blue stained head-cartilage of 4dpf *Shp2*<sup>wt</sup> and *Shp2*<sup>D61G/wt</sup> embryos. (x) width of ceratohyal, (y) distance to Meckel's cartilage. **g** Quantified craniofacial defects (x/y ratio). **h** Representative ventricular kymographs derived from high speed video recordings of beating hearts of 5dpf *Shp2*<sup>wt</sup> and *Shp2*<sup>D61G/wt</sup> embryos. Red dotted lines indicate one heart period. **i** Heart rates derived from the ventricular kymographs. **j** Representative images of typical *Shp2*<sup>D61G</sup> zebrafish adult phenotypes at 24wpf. Red arrows indicate skin redness in the jaw region. Scale bar is 0.5cm. Insets, zoom-in of boxed regions. **k** Body axis lengths of 10 *Shp2*<sup>wt</sup>, 25 *Shp2*<sup>D61G/wt</sup> and 10 *Shp2*<sup>D61G/D61G</sup> zebrafish measured weekly between 5dpf and 20wpf of age. **d,e,g,i** Measurements originate from three distinct experiments. Number on bars: number of embryos. **e,g,i,k** Error bars: standard error of the mean (SEM), \*p < 0.05; \*\*p < 0.01, ANOVA complemented by Tukey HSD.

147 **Shp2<sup>D61G</sup> zebrafish embryos develop myeloproliferative blood defect**  
148 **originating in defective HSPCs**

149 Next we explored hematopoietic abnormalities in the Shp2<sup>D61G</sup> zebrafish  
150 during embryonic development, corresponding to prenatal hematopoietic ontogeny in  
151 human. We were not able to observe any effect of the Shp2<sup>D61G</sup> mutation on primitive  
152 hematopoiesis in embryos at 2dpf using WISH for markers of erythroid progenitors  
153 (*gata-1*), myeloid progenitors (*pu.1*) and white blood cells (*l-plastin*) (**Supplementary**  
154 **Fig. 2a**). On the other hand, a significant effect of the Shp2-D61G mutation on  
155 definitive hematopoiesis was observed at 5dpf (**Fig. 2**). An increased number of  
156 HSPCs marked by CD41-GFP<sup>low</sup> was observed in the caudal hematopoietic tissue  
157 region (CHT, corresponding to the fetal liver in human) and the head kidney  
158 (corresponding to the bone marrow in human) of the mutant embryos (**Fig. 2a,b**).  
159 Shp2<sup>D61G</sup> mutation seems to affect both proliferation and apoptosis of HSPCs,  
160 evident by an increase in CD41-GFP<sup>low</sup> cells positive for phosphohistone H3 (pHis3),  
161 a marker for late G2 and M phase and a decrease in Acridine orange positive cells in  
162 the CHT region, marking apoptotic cells (**Supplementary Fig. 2b,c**). We observed  
163 an increase of *c-myb* positive cells, marking HSPCs and of *l-plastin* positive cells,  
164 marking all white blood cells, in both CHT and head kidney region of the Shp2<sup>D61G</sup>  
165 mutants (**Fig. 2c-f**). These latter cells appear not to be lymphocytes, since the size of  
166 the *ikaros*-positive thymus, was not affected (**Supplementary Fig. 2d,e**). On the  
167 other hand, the myeloid lineage was markedly expanded, evident from the increase  
168 in the number of mpx-GFP positive neutrophils (**Fig. 2g,h**), and mpeg-mCherry  
169 positive macrophages (**Fig. 2g,i**), in the Tg(*mpx:GFP, mpeg:mCherry*) double  
170 transgenic mutant embryos. Shp2<sup>D61G</sup> mutant embryos also displayed a mild  
171 decrease in the number of thrombocytes, marked by CD41-GFP<sup>high</sup> in the  
172 Tg(*cd41:GFP, kdrl:mCherry-CAAX*) transgenic line, and number of *β-globin* positive  
173 erythrocytes (**Supplementary Fig. 2f-h**). The observed defects in all different blood  
174 lineages examined here were stronger in the homozygous Shp2<sup>D61G/D61G</sup> than  
175 heterozygous Shp2<sup>D61G/wt</sup> embryos, supporting a dosage effect. One of the clinical  
176 hallmarks of JMML is the hypersensitivity of myeloid progenitors to GM-CSF. In  
177 zebrafish, effects of stimulation by Gcsfa or Gscfb corresponds to the GM-CSF  
178 stimulation in human (Svoboda et al., 2016). Compared to their wt siblings, colonies  
179 developed from the CD41-GFP<sup>high</sup> cells isolated from the Shp2<sup>D61G</sup> zebrafish



180 embryos at 5dpf and exposed to Gcsfa were larger in size and number,  
181 demonstrating an enhanced GM colony forming ability (**Fig. 2j,k**). Finally, we tested  
182 whether the observed myeloid expansion was reconstituted upon transplantation of  
183 the WKM cells harvested from *Shp2<sup>D61G/wt</sup>* animals in the *Tg(mpx:GFP,*  
184 *mpeg:mCherry)* background into the optically clear recipient *prkdc<sup>-/-</sup>*  
185 immunodeficient zebrafish (Moore et al., 2016). Animals injected with  $1 \times 10^5$  mutant  
186 WKM cells (3/5) accumulated GFP- and mCherry- positive cells near the site of  
187 injection starting at 14 days and increasing until 28 days. By contrast, animals  
188 injected with WKM cells from control sibling animals with wt *Shp2a* (5/5) lacked any  
189 GFP- and mCherry- positive cells (**Fig. 2l**).

190 Our findings suggest that the *Shp2<sup>D61G</sup>* mutant zebrafish embryos develop  
191 multilineage hematopoietic defects during the definitive wave of fetal hematopoiesis,  
192 which originates in the HSPCs compartment. The observed defect is reminiscent of  
193 JMML-like MPN in human NS patients.

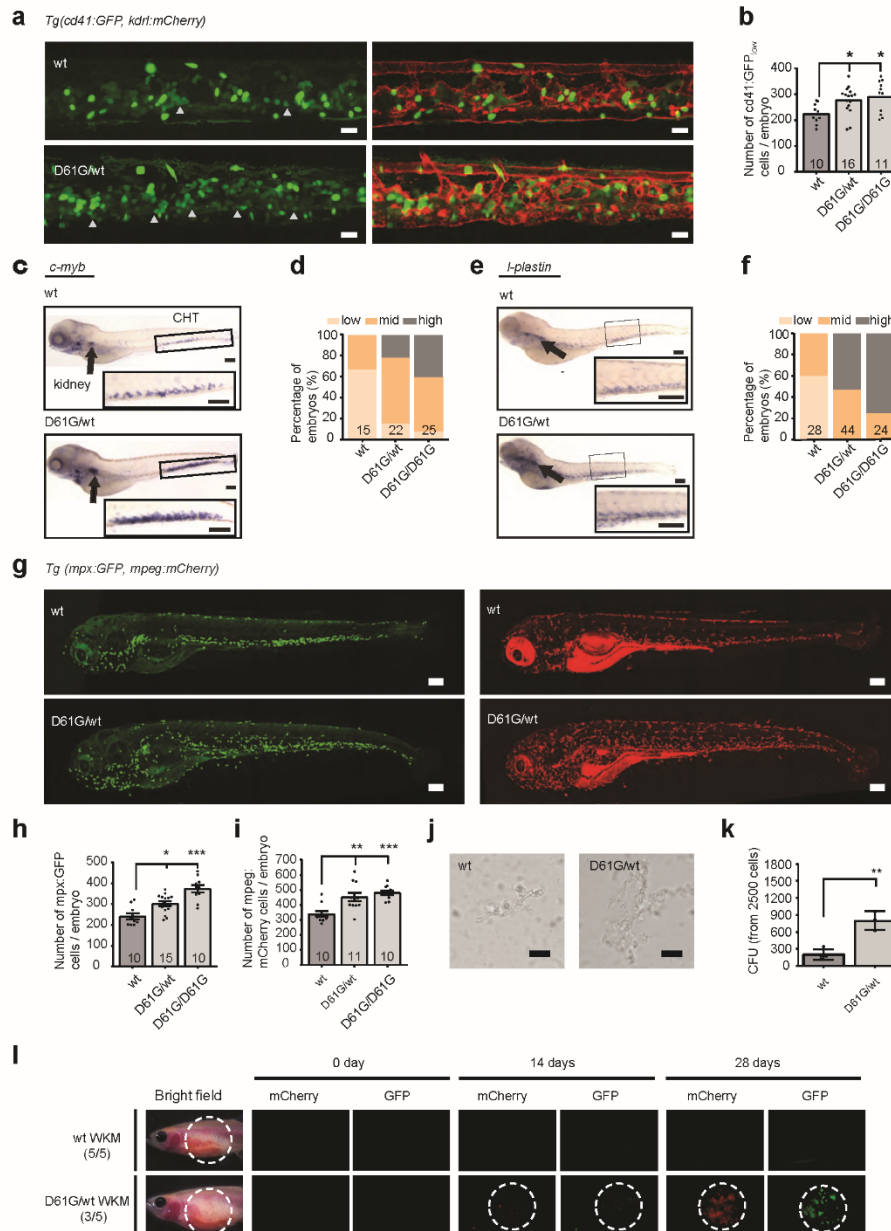

**Figure 2. *Shp2<sup>D61G</sup>* mutant zebrafish embryos display JMML-like MPN. a** Representative images of the CHT region of *Shp2<sup>wt</sup>* and *Shp2<sup>D61G</sup>* zebrafish embryos in *Tg(cd41:GFP, kdrl:mCherry-CAAX)* background at 5dpf. *cd41:GFP<sup>low</sup>* cells mark HSPCs and *cd41:GFP<sup>high</sup>* cells thrombocytes. Grey arrow heads indicate *cd41:GFP<sup>low</sup>* cells. Scale bar, 20 $\mu$ m. **b** The low intensity *cd41:GFP* positive cells in the CHT region were counted. **c** WISH of 5dpf *Shp2<sup>wt</sup>* and *Shp2<sup>D61G/wt</sup>* embryos using *c-myb* specific probe. Head kidney (arrow) and CHT (box) are indicated; zoom-in in insert. Scale bars, 150 $\mu$ m. **d** Quantification of *c-myb* WISH. *c-myb* expression in *Shp2<sup>wt</sup>*, *Shp2<sup>D61G/wt</sup>* and *Shp2<sup>D61G/D61G</sup>* embryos was scored as low, mid and high. **e** WISH of 5dpf *Shp2<sup>wt</sup>* and *Shp2<sup>D61G/wt</sup>* embryos using *I-plastin* specific probe. Head kidney (arrow) and CHT (box) are indicated and zoom-in in insert. Scale bars, 150 $\mu$ m. **f** Quantification of *I-plastin* expression in *Shp2<sup>wt</sup>*, *Shp2<sup>D61G/wt</sup>* and *Shp2<sup>D61G/D61G</sup>* embryos scored as low, mid and high. **g** Representative images of *Shp2<sup>wt</sup>* and *Shp2<sup>D61G</sup>* zebrafish embryos in *Tg(mpx:GFP, mpeg:mCherry)* background at 5dpf. *Mpx:GFP* marks neutrophils and *mpeg:mCherry* macrophages. Scale bars, 150 $\mu$ m. **h,i** Number of *mpx:GFP* and *mpeg:mCherry* positive cells per embryo. **j** Representative images of colonies developed from *cd41:GFP<sup>low</sup>* cells isolated from the CHT of 5dpf *Shp2<sup>wt</sup>* and *Shp2<sup>D61G/wt</sup>* zebrafish embryos, grown in methylcellulose with zebrafish cytokine Gcsfa for 2 days. Scale bar, 50 $\mu$ m. **k** Quantification of number of colonies from **j**, t-test. **l** WKM cells harvested from *Shp2<sup>wt</sup>* and *Shp2<sup>D61G</sup>* zebrafish in the *Tg(mpx:GFP, mpeg:mCherry)* background were injected into the peritoneum of adult *prkdc<sup>-/-</sup>* zebrafish. Recipients were monitored by fluorescence imaging. **b,d,f,h,i,k** Measurements originate from at least three distinct experiments. Number on bars: number of embryos. **b,h,i,k** Error bars represent SEM. \**p* < 0.05, \*\**p* < 0.01, \*\*\**p* < 0.001. **b,h,i** ANOVA complemented by Tukey HSD.

## 194 **Myeloid bias is established during early differentiation of Shp2<sup>D61G</sup> HSPCs**

195 In an effort to better understand the pathogenesis mechanisms in the  
196 Shp2<sup>D61G</sup> mutant HSPCs, single cell RNA sequencing was performed using SORT-  
197 Seq on CD41-GFP<sup>low</sup> cells derived from 5dpf Shp2<sup>wt</sup>, Shp2<sup>D61G/wt</sup> and Shp2<sup>D61G/D61G</sup>  
198 zebrafish embryos in the Tg(*cd41:GFP*, *kdrl:mCherry-CAAX*) transgenic background  
199 (**Fig. 3a,b**). To group cells based on their transcriptional program, unsupervised  
200 clustering was performed using the RaceID3 package (Herman et al., 2018).  
201 Clusters were visualized by *t*-distributed stochastic neighbor embedding (*t*-SNE) and  
202 4 major clusters were further analyzed (**Fig. 3c**). Based on the differentially  
203 expressed genes and GO term analysis, cells from Cluster 1 were determined to be  
204 thrombocyte and erythroid progenitors, Cluster 2 HSC-like HSPCs, Cluster 3 early  
205 myeloid progenitors and Cluster 4 monocyte/macrophage progenitors (**Fig. 3c**,  
206 **Supplementary Fig. 3a, Supplementary Table 1**). A small subset of cells in Cluster  
207 4 represented more differentiated neutrophils (**Supplementary Fig. 3b**).

208 HSPCs of either Shp2<sup>wt</sup> or mutant Shp2<sup>D61G/wt</sup> and Shp2<sup>D61G/D61G</sup> genotypes  
209 were present in all 4 major clusters, indicating that distinct HSPCs phenotypes were  
210 maintained on a gene transcription level. However, the distribution of cells in clusters  
211 differed among genotypes. An overrepresentation of mutant Shp2<sup>D61G/wt</sup> and  
212 Shp2<sup>D61G/D61G</sup> cells was observed in the HSC-like HSPCs cluster and  
213 monocytes/macrophages progenitors cluster, whereas these were underrepresented  
214 in the thrombocyte and erythroid progenitors cluster (**Fig. 3d,e**). To validate this  
215 observation, we investigated the expression of *pu.1* and *alas2* markers in Shp2<sup>D61G</sup>  
216 embryos of different genotypes by WISH. In the single cell RNA sequencing dataset,  
217 expression of *pu.1* and *alas2* was upregulated in the myeloid progenitors and  
218 erythroid progenitors, respectively (**Fig. 3f,i**). An increased number of *pu.1* positive  
219 cells was detected by WISH in 5dpf old Shp2<sup>D61G</sup> embryos compared to their Shp2<sup>wt</sup>  
220 siblings (**Fig. 3g,h**), whereas the number of *alas2* positive cells in Shp2<sup>D61G</sup> mutants  
221 was decreased (**Fig. 3j,k**).

222 Taken together, single cell RNA sequencing suggests that defects during  
223 early differentiation of HSPCs to monocyte/macrophage progenitors and  
224 erythroid/thrombocyte progenitors initiate the multilineage blood defect observed in  
225 Shp2<sup>D61G</sup> embryos, which recapitulates features of NS-JMML-like MPN.

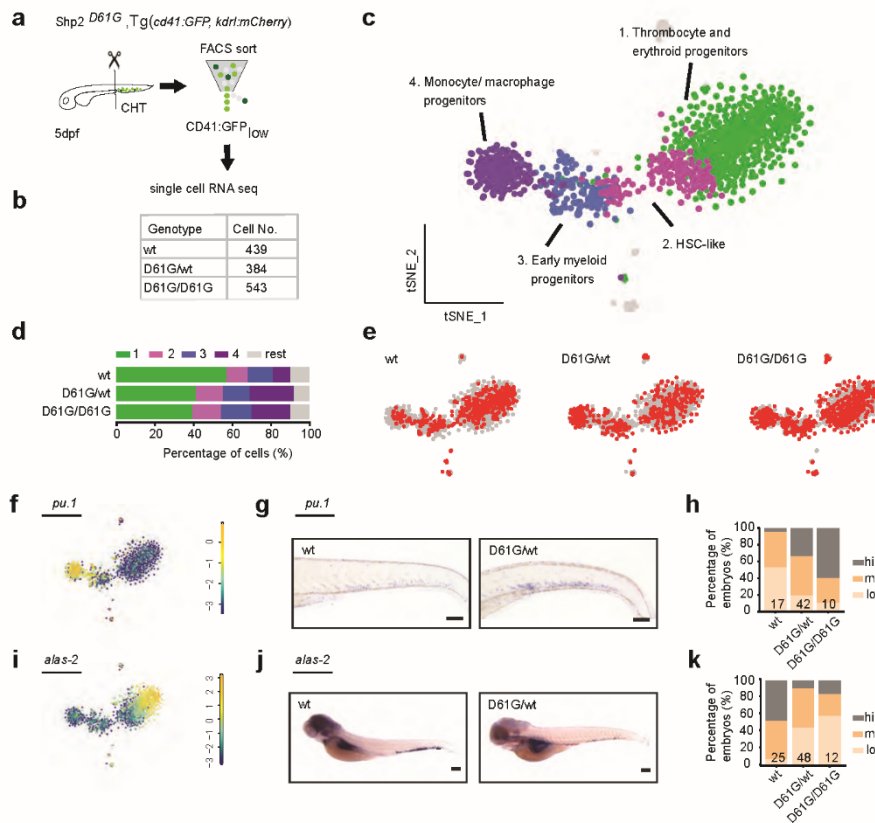

**Figure 3. Single cell RNA sequencing of HSPCs reveals myeloid bias in Shp2<sup>D61G</sup> embryos.** **a** Schematic representation of the experimental procedure. At 5dpf, CHTs from Shp2<sup>wt</sup>, Shp2<sup>D61G/wt</sup> and Shp2<sup>D61G/D61G</sup> embryos in Tg(cd41:GFP, kdrl:mCherry-CAAX) background were isolated. Cells were dissociated and separated by FACS, based on cd41:GFP<sup>low</sup> expression, prior to single cell RNA sequencing, as described in the Materials and methods section. **b** Number of cells of distinct genotypes used in single cell RNA sequencing analysis. **c** Combined tSNE map generated using the cells of all three genotypes (Shp2<sup>wt</sup>, Shp2<sup>D61G/wt</sup> and Shp2<sup>D61G/D61G</sup>). Single cells from 4 major clusters are marked in violet, blue, pink and green and their identities based on marker gene expression are indicated. Minor clusters are marked in grey. **d** Barplots showing the percentage of cells of Shp2<sup>wt</sup>, Shp2<sup>D61G/wt</sup> and Shp2<sup>D61G/D61G</sup> genotype in distinct clusters. **e** Cells of distinct genotypes Shp2<sup>wt</sup>, Shp2<sup>D61G/wt</sup> and Shp2<sup>D61G/D61G</sup> are visualized in tSNE maps in red. **f** tSNE maps showing log<sub>2</sub>-transformed read-counts of *pu.1*. **g** Representative images of the WISH staining for *pu.1* expression in 5dpf Shp2<sup>wt</sup> and Shp2<sup>D61G</sup> zebrafish embryos. Scale bar, 100µm. **h** Expression of the *pu.1* marker scored as low, mid and high. **i** tSNE maps showing log<sub>2</sub>-transformed read-counts of *alas-2*. **j** Representative images of the WISH staining for *alas-2* expression in the tail region of 5dpf Shp2<sup>wt</sup> and Shp2<sup>D61G</sup> zebrafish embryos. Scale bar, 100µm. **k** Expression of the *alas-2* marker scored as low, mid and high. **h,k** Number on bars: number of embryos.

## 226 Excessive proinflammatory response in monocyte/macrophage progenitors of 227 Shp2<sup>D61G</sup> HSPCs

228 We further analyzed the cluster of monocyte/macrophage progenitors, in  
229 which we observed an overrepresentation of mutant Shp2<sup>D61G</sup> cells (Fig. 4a).  
230 Functional annotation of the differentially expressed genes and the GO-term  
231 enrichment analysis revealed enhanced expression of proinflammatory genes in  
232 mutant Shp2<sup>D61G</sup> cells (Fig. 4a,b, Supplementary Table 1). Interestingly, expression  
233 of inflammation-related genes, such as *gcsfa*, *gcsfb*, *il1b*, *irg1* and *nfkbiaa*, was

234 constrained to the cells of mutant *Shp2<sup>D61G</sup>* genotype in the monocyte/macrophage  
 235 progenitors cluster, whereas the monocyte marker *timp2a* was equally expressed by  
 236 cells of distinct genotypes (**Fig. 4b**). High expression of IL-1 $\beta$  was validated in  
 237 mutant embryos *in vivo*, in which IL-1 $\beta$ -eGFP positive cells were more abundant in  
 238 the CHT region of *Shp2<sup>D61G</sup>* embryos than in wt embryos in the Tg(*il1b:eGFP*,  
 239 *mpeg:mCherry*) transgenic background (**Fig. 4c**). These results indicate that  
 240 *Shp2<sup>D61G</sup>* embryos display an inflammatory response at 5 dpf, which originates in the  
 241 monocyte/macrophage progenitor cells.

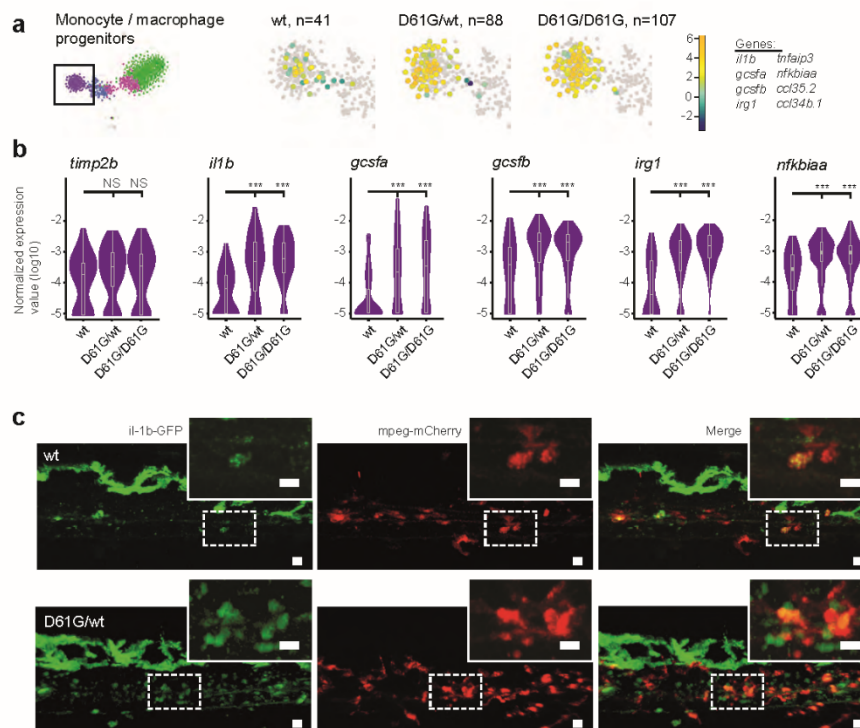

**Figure 4. Inflammatory response in monocyte/ macrophage progenitors in *Shp2<sup>D61G</sup>* embryos.**  
**a** The monocyte/macrophage progenitors cluster (boxed on the tSNE map on left) was analyzed in detail. log<sub>2</sub>-transformed sum of read-counts of selected inflammation-related genes from the top 50 differentially expressed genes in the cells of the monocyte/macrophage progenitors cluster, with genotype and number of cells (n) indicated above. **b** Violin plots show the expression of specific genes in monocyte/macrophage progenitors of *Shp2<sup>wt</sup>*, *Shp2<sup>D61G/wt</sup>* and *Shp2<sup>D61G/D61G</sup>* genotypes. NS, not significant, \*\*\*p < 0.001, t-test. **c** *In vivo* imaging of the CHT region of *Shp2<sup>wt</sup>* and *Shp2<sup>D61G/wt</sup>* zebrafish embryos in Tg(*il1b:eGFP*, *mpeg:mCherry*) background at 5 dpf. Representative images are shown. The dashed line boxed region of CHT is zoom-in in insert. Scale bar is 10 $\mu$ m.

242 ***PTPN11* Somatic mutations induce inflammatory response genes in HSPCs of**  
243 **JMML patients.**

244 We hypothesized that activating mutations in Shp2 may trigger an  
245 inflammatory response in a similar way in sporadic JMML as we observed in  
246 syndromic JMML-like MPN. To investigate this, we performed transcriptomic analysis  
247 of the HSPCs compartments derived from bone marrows of sporadic JMML patients  
248 with activating mutations in SHP2 (n=5) and age-matched healthy donors (n=7). The  
249 SHP2 mutations in JMML HSPCs were distinct among patients (**Supplementary**  
250 **Table 2**). Overall, we identified 1478 differentially expressed genes (DEGs) in  
251 HSPCs from JMML patients, compared to the healthy donor HSPCs (**Fig. 5a,**  
252 **Supplementary Table 3**). The functional analysis of DEGs using gene set  
253 enrichment analysis (GSEA) was performed to systematically explore hallmark gene  
254 signatures specific for JMML HSPCs (**Fig. 5b, Supplementary Table 4**). Strikingly,  
255 altered expression of genes related to inflammation was the most prominent, such as  
256 genes involved in TNF $\alpha$  signaling via NFKB and inflammatory response genes, which  
257 were significantly enriched in JMML HSPCs (**Fig. 5b-d**). De-regulation of genes  
258 related to proliferation (G2M checkpoint, MYC targets and E2F targets) was evident  
259 in JMML HSPCs, suggesting their decreased quiescence (**Fig. 5b**).

260 We next studied whether the inflammatory-related gene signature overlaps  
261 between HSPCs from zebrafish NS/JMML-like MPN model and human JMML. GSEA  
262 revealed that human orthologs of the top 100 DEGs found in the zebrafish  
263 monocyte/macrophage progenitor cells were enriched significantly in patient JMML  
264 HSPCs (**Fig. 5e**). Some of the top overexpressed inflammation-associated genes in  
265 JMML patients, such as TNF and MARCKSL were also overexpressed in NS/JMML-  
266 like MPN mutant zebrafish embryos compared to the wt (**Fig. 5f,g**). 3D PCA analysis  
267 visualized that these zebrafish signature genes were able to clearly segregate  
268 HSPCs from JMML patients and healthy donors (**Fig. 5h**). These findings suggest  
269 that mutant, activated SHP2 triggers proinflammatory gene expression in HSPCs  
270 both in sporadic JMML patients and in our zebrafish model of syndromic JMML-like  
271 MPN in a similar manner, suggesting a common underlying, endogenously driven  
272 process.

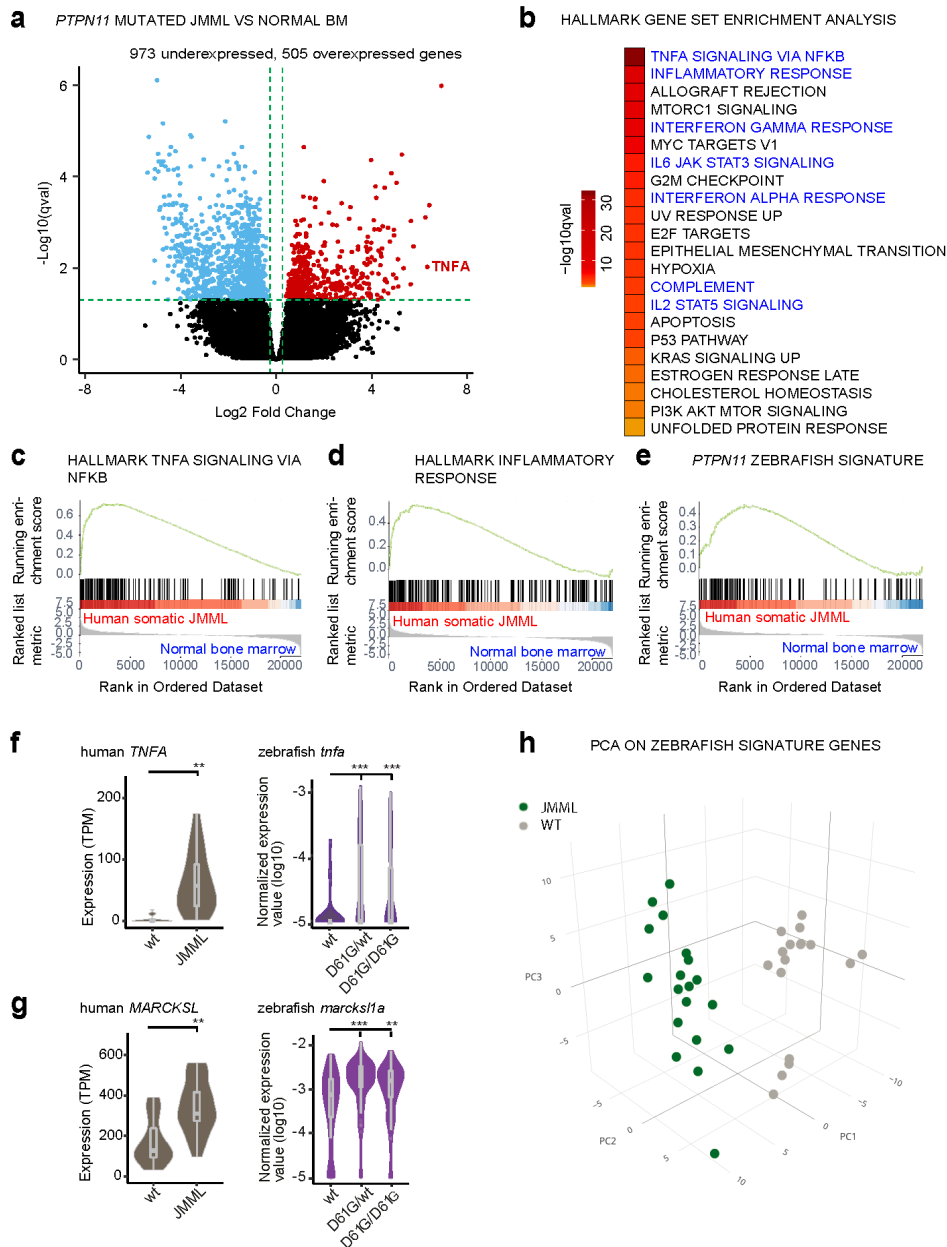

**Figure 5. Similar molecular signatures in HSPCs from human JMML patients and zebrafish Shp2<sup>D61G</sup> embryos.** **a** Volcano plot of differentially expressed genes of HSPCs derived from bone marrow of JMML patients with *PTPN11* mutations (n=5) and healthy bone marrow (n=7). Underexpressed genes are marked in blue and overexpressed genes are marked in red. *TNFA* expression is highlighted. Green dashed lines indicate the significance level. **b** GSEA for the MSigDB's hallmark gene sets in HSPCs from JMML compared to normal human age-matched bone marrow. GSEA plots for *TNFA*\_SIGNALING\_VIA\_NFKB (**c**), INFLAMMATORY RESPONSE (**d**), and the custom Zebrafish signature based on the top 100 human orthologous of genes upregulated in monocyte/macrophage progenitor cluster of zebrafish HSPCs (**e**). Violin plots show the expression of *TNFA* (**f**) and *MARCKSL* (**g**) in either human wt vs. JMML HSPCs, and zebrafish Shp2<sup>wt</sup> vs. Shp2<sup>D61G/wt</sup> and Shp2<sup>D61G/D61G</sup> monocyte/macrophage HSPC progenitors. \*\*p<0.01, \*\*\*p < 0.001, t-test. **h** PCA for the 100 genes included in the custom zebrafish signature. Green dots represent *PTPN11* mutated JMML, gray ones represent normal human age-matched bone marrow. PC1: 19% of the variance, PC2: 16% of the variance, PC3: 14% of the variance.

273 **Inhibition of the proinflammatory response ameliorates the JMML-like MPN**  
274 **phenotype**

275 Our results indicate that  $Shp2^{D61G}$  embryos displayed JMML-like MPN (**Fig.**  
276 **2**). To investigate if pharmacological agents ameliorate the observed hematopoietic  
277 defects,  $Shp2^{D61G}$  embryos were exposed to inhibitors continuously from 2 to 5 dpf  
278 and subsequently *c-myb* and *I-plastin* markers were investigated by WISH (**Fig. 6a**).  
279 Inhibitors of the known Shp2-associated signaling pathways were used, targeting  
280 MEK (CI1040) or PI3K (LY294002) (Tajan et al., 2015). Both inhibitors led to a  
281 robust reduction in expansion of both HSPCs and myeloid lineage in mutant  
282 embryos (**Fig. 6b,c**), demonstrating that the NS-associated blood development  
283 defect in  $Shp2^{D61G}$  embryos was largely caused by overactivation of the RAS-MAPK  
284 and PI3K pathways as expected.

285 The HSPCs of  $Shp2^{D61G}$  embryos displayed a proinflammatory response (**Fig.**  
286 **4**), similar to the inflammatory response in HSPCs from human patients (**Fig. 5**). To  
287 investigate the role of the inflammatory response in the blood defect, we assessed  
288 the effect of dexamethasone in  $Shp2^{D61G}$  embryos in parallel to the MEK- and PI3K  
289 inhibitors. Dexamethasone is an anti-inflammatory agent, which is known to  
290 suppress inflammatory response in the monocyte/macrophage lineage (Ehrchen et  
291 al., 2019). To our surprise, dexamethasone reduced *c-myb* and *I-plastin* expression  
292 to a similar extent as CI1040 and LY294002 (**Fig. 6b,c**), indicating a profound role  
293 for the inflammatory response in the pathogenesis of NS-associated blood defects.  
294 Taken together, we observed a proinflammatory phenotype of the macrophage/  
295 monocyte lineage in  $Shp2^{D61G}$  mutant zebrafish, which is established early during  
296 HSPCs differentiation. Since an anti-inflammatory agent largely rescued the  
297 hematopoietic defects, we conclude that the inflammatory response in  $Shp2^{D61G}$   
298 mutant zebrafish mediates the pathogenesis of the NS/JMML-like MPN blood  
299 phenotype.

300



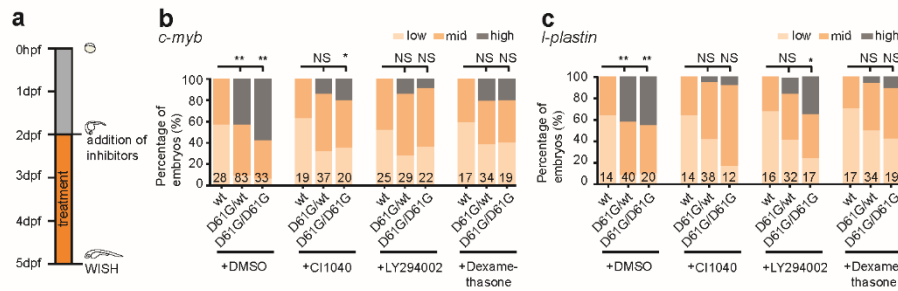

**Figure 6. Anti-inflammatory treatment of zebrafish *Shp2*<sup>D61G</sup> embryos ameliorates the JMML-like MPN phenotype.** **a** Schematic overview of the treatments with MEK inhibitor CI1040, PI3K inhibitor LY294002 and anti-inflammatory corticosteroid dexamethasone. Embryos were continuously treated from 48hpf until 5dpf, when WISH was performed and expression of the *c-myb* (**b**) and *I-plastin* (**c**) marker was scored as low, mid and high. Measurements originate from at least three distinct experiments. Number on bars: number of embryos. NS, not significant; \*p < 0.05, \*\*p<0.01, \*\*\*p<0.001, Chi-squared test.

## 301 Discussion

302 To investigate the timing and pathophysiology of mutant SHP2-related  
 303 myeloproliferative defects, we explored the transcriptomes of HSPCs with activating  
 304 mutations in SHP2, derived from sporadic JMML patients and syndromic NS/JMML-  
 305 like MPN zebrafish embryos, by bulk and single cell sequencing, respectively.  
 306 Strikingly, proinflammatory gene expression was evident both in HSPCs from JMML  
 307 patients and mutant zebrafish. Already early studies reported high levels of  
 308 proinflammatory cytokines, such as IL-1 $\beta$ , TNF- $\alpha$ , GM-CSF, in JMML patients  
 309 plasma (Bagby et al., 1988; Freedman et al., 1992). However, little is known about  
 310 the cellular origin of the proinflammatory status, its pathophysiological role and  
 311 therapeutic potential. The inflammatory response may be initiated in a cell  
 312 autonomous way or in response to signals from the microenvironment. Dong et al.  
 313 suggested that IL-1 $\beta$  is secreted by differentiated monocytes which get recruited  
 314 upon secretion of the Chemokine, CCL3, by cells of the bone marrow  
 315 microenvironment containing activating SHP2 mutations. However, the levels of  
 316 CCL3 in the bone marrow of four NS patients varied (Dong et al., 2016).  
 317 Furthermore, a microenvironment-driven inflammatory response would not explain  
 318 high levels of cytokines in sporadic JMML, where niche cells are not mutated. On the  
 319 other hand, recent reports indicate that JMML leukemia stem cells are  
 320 heterogeneous but confined to the hematopoietic stem and progenitor cells (HSPCs)  
 321 compartment, defining JMML HSPCs as the origin of the disease (Caye et al., 2019;  
 322 Louka et al., 2021).

323 Here we identified HSPCs as the cells in which the proinflammatory status of  
324 the monocyte/macrophage lineage is initiated both in JMML and NS/JMML-like MPN.  
325 Hence, our data suggest that proinflammatory reprogramming of the  
326 monocyte/macrophage lineage might be endogenously driven at least in part, and  
327 detailed mechanisms remain to be elucidated in the future.

328 To our knowledge, the Shp2<sup>D61G</sup> mutant zebrafish we developed is the first NS  
329 zebrafish model carrying an activating Shp2 mutation at its endogenous locus  
330 generated by CRISPR/Cas9-based knock-in technology. Strikingly, phenotypes  
331 developed by the Shp2<sup>D61G</sup> zebrafish corroborate closely with the phenotypes  
332 displayed by human NS patients and the existing NS mouse models (**Fig. 1**). Our  
333 model presents an exciting novel tool for deciphering pathogenesis mechanisms of  
334 NS with its complex traits and for finding novel therapies for this as yet poorly  
335 treatable condition.

336 NS children with D61G mutation have a higher predisposition to develop  
337 JMML(-like MPN), and comparably Shp2<sup>D61G</sup> zebrafish embryos displayed typical  
338 JMML-like MPN characteristics, such as expansion of the myeloid lineage, increased  
339 sensitivity to gcsfa, mild anemia and thrombocytopenia (**Fig. 2**). Furthermore, the  
340 observed blood defect was transplantable to secondary recipients and the disease  
341 originated in HSPCs, which displayed aberrant proliferation and apoptosis. Given the  
342 importance of fetal hematopoiesis during JMML(-like MPN) development, the  
343 zebrafish Shp2<sup>D61G</sup> mutant represents a reliable and unique model for JMML-like  
344 MPN, which allows us to study hematopoietic defects caused by mutant Shp2 during  
345 the prenatal development for the first time. Our results suggest that the JMML-like  
346 MPN defect is initiated at the CHT, which is the counterpart of fetal liver in human.  
347 Here we observed expanded HSPCs, which displayed aberrant proliferation and  
348 apoptosis. We further characterized the transcriptomes of HSPCs specifically  
349 originating from the CHT, and studied their response to inhibitor treatments directly  
350 at the CHT. Striking similarities between the patient and zebrafish HSPCs  
351 transcriptomes indicate that the Shp2<sup>D61G</sup> zebrafish model is an exciting preclinical  
352 model for *in vivo* drug screens at relevant developmental time points, in a high  
353 throughput manner.

354 The only effective treatment of JMML is allogeneic stem cell transplantation,  
355 which has a high relapse rate of 50%. Hence, there is a great need for other means  
356 of therapeutic intervention. The role of inflammation as one of the drivers in myeloid

357 leukemogenesis is emerging (Arranz et al., 2017; Craver et al., 2018). Here we  
358 demonstrate that dampening inflammation using the glucocorticoid dexamethasone,  
359 partially rescued the observed blood phenotype in *Shp2<sup>D61G</sup>*, suggesting that the  
360 inflammatory response evoked in the cells of myeloid/macrophage lineage was an  
361 important driver of the NS/JMML-like blood defect and might be a potential drug  
362 target for both sporadic and syndromic JMML(-like MPN). To our surprise, targeting  
363 inflammation reversed the blood defect to a similar extent as the MAPK and PI3K  
364 pathway inhibitors, emphasizing not only the crucial role of inflammation during  
365 JMML pathogenesis, but also its strong therapeutic potential. Since anti-  
366 inflammatory therapies are non-invasive and widely available, targeting inflammation  
367 might represent a novel avenue for JMML treatment, either alone or in combination  
368 with other therapies.

369         In conclusion, we observed striking similarities in expression patterns of  
370 HSPCs from sporadic human JMML patients with an activating SHP2 mutation and  
371 HSPCs from an engineered zebrafish model with an activating NS-associated  
372 mutation in *Shp2*. Particularly genes associated with the inflammatory response  
373 were upregulated and strikingly, pharmacological inhibition of the inflammatory  
374 response ameliorated JMML-like MPN in the zebrafish model, suggesting this may  
375 be a first step for therapeutic intervention in human patients.

## 376 **Materials and methods**

### 377 **Zebrafish husbandry**

378 All procedures involving experimental animals were approved by the animal  
379 experiments committee of the Royal Netherlands Academy of Arts and Sciences  
380 (KNAW), Dierexperimenten commissie protocol HI18-0702, and performed under the  
381 local guidelines in compliance with national and European law. The following  
382 zebrafish lines were used in the study: Tübingen longfin (TL, wild type),  
383 Tg(*cd41:GFP, kdrl:mCherry-CAAX*) (Hogan et al., 2009; Lin et al., 2005),  
384 Tg(*mpx:GFP, mpeg:mCherry*) (Ellett et al., 2011; Renshaw et al., 2006),  
385 TgBAC(*il1b:eGFP*)sh445 (Ogryzko et al., 2019), *ptpn11b*<sup>-/-</sup> (Bonetti et al.,  
386 2014)*prkdc*<sup>-/-</sup> (Moore et al., 2016) and the novel Shp2<sup>D61G</sup> zebrafish line. Raising and  
387 maintenance of zebrafish was performed according to (Aleström et al., 2020;  
388 Westerfield, 2000). When required, pigmentation of embryos was blocked by adding  
389 phenylthiourea (PTU) (Sigma Aldrich, St. Louis, MO, USA, Ref: P7629) at a  
390 concentration of 0.003% (v/v) to the E3 medium at 24hpf.

### 391 **Patient material**

392 All children's samples were obtained after parents had given their written informed  
393 consent. Experiments were approved by the institutional review board of the French  
394 Institute of Health and Medical Research (INSERM) (IORG0003254) in accordance  
395 with the Helsinki declaration. Healthy children bone marrows were obtained from  
396 intrafamilial BM transplantation donors and used with the approval of the Institutional  
397 Review Board of "Hôpitaux Universitaires Paris Nord Val-de-Seine," Paris 7  
398 University, AP-HP), (IRB: 00006477), in accordance with the Helsinki declaration.  
399 HSPCs fractions were FACS sorted according to immunophenotypic signature as  
400 previously described (Caye et al., 2019), from PTPN11<sup>mut</sup> JMML (n=5) and healthy  
401 children bone marrow (n=7). Age, sex, mutations and fractions available for each  
402 sample (Hematopoietic stem cells (HSCs), multipotent progenitors (MPPs), common  
403 myeloid progenitors (CMPs), granulocyte-macrophage progenitors (GMPs), and  
404 megakaryocyte-erythroid progenitors (MEPs) ) are indicated in Supplementary Table  
405 2.

### 406 **Generation of the Shp2<sup>D61G</sup> zebrafish line**

407 The Shp2<sup>D61G</sup> zebrafish line was generated using the previously described  
408 CRISPR/Cas9-based knock-in approach (Tessadori et al., 2018). The sgRNA

409 targeting exon 3 of the *ptpn11a* gene (5'- GGAGACTATTACGACCTGTA-3') was  
410 designed using the CHOP-CHOP database (<http://chopchop.cbu.uib.no/>), further  
411 processed according to the previously published guidelines (Gagnon et al., 2014)  
412 and finally transcribed using the Ambion MEGAscript T7 kit (TermoFisher Scientific,  
413 Waltham, MA, USA, Ref: AMB13345). The sgRNA, constant oligonucleotide and  
414 template oligonucleotide were all generated by Integrated DNA Technologies (IDT,  
415 Coralville, IA, USA) as standard desalted oligos and template oligonucleotide was  
416 further purified using the QIAquick Nucleotide Removal Kit (Qiagen, Hilden,  
417 Germany, Ref: 28304). The oligonucleotide used for the homology repair is 59  
418 nucleotides long and besides the D61G mutation, contains three additional silent  
419 mutations in proximity of the PAM site. The sequence of template oligonucleotide is  
420 5'-  
421 GAGTGGCAAACCTTCTCTCCACCATATAAATCGTAATAGCCTCCTGTGTTTTGAAT  
422 CTTA-3'. Tübingen longfin wt zebrafish embryos at the one-cell-stage were injected  
423 directly in the cell with 1 nl of the injection mixture containing 18.75 ng/ml of sgRNA,  
424 37.5 ng/ml of template oligonucleotide and 3.6 mg/ml of Cas9 protein in 300 mM  
425 KCl. Cas9 protein was a gift from the Niels Geijsen laboratory at the Hubrecht  
426 Institute. The injected embryos were grown into the adulthood. F0 generation  
427 zebrafish were outcrossed with the wt zebrafish. DNA extracted from the 12 distinct  
428 1dpf old F1 generation embryos was screened for the correct insertion of the  
429 template oligonucleotide. Screening was done by Sanger sequencing (Macrogen  
430 Europe B.V., Amsterdam, The Netherland) of the 225 bp long PCR product  
431 encompassing the genomic regions of the CRISPR target sites, which was  
432 generated using the forward 5'-TCATCTCCTCACTAGGCGAAAT-3' and reverse  
433 primer 5'- TATGTATGTGCTCACCTCTCGG-3'. The efficiency of the knock-in was  
434 1.8% (1 founder zebrafish in 54 screened primary injected zebrafish). F1 generation  
435 was then established from the F0 founder. F1 generation adults were finclipped and  
436 sequenced for the presence of the mutation. All experiments were performed in  
437 zebrafish embryos and adults from the F3 and F4 generation. For most of the  
438 experiments, embryos were derived from an incross of *Shp2<sup>D61G/wt</sup>* animals. After the  
439 experimental procedure, embryos were lysed and genotyped by sequencing as  
440 described above. Western blotting was performed as previously described (Hale &  
441 den Hertog, 2017) using the Shp2 (Santa Cruz Biotechnology, Dallas, TX, USA, Ref:  
442 SC-280) and  $\beta$ -tubulin (Merck Millipore, Burlington, MA, USA Ref: CP06) antibodies.

## 443 **Phenotyping of the NS traits**

444 Body axis lengths were measured from the tip of the head to the end of the trunk in  
445 the bright-field images of laterally positioned embryos, larva and adults, which were  
446 anesthetized in 0.1% MS-222. Alcian blue (Sigma Aldrich, Ref: A5268) staining was  
447 performed as previously described (Paardekooper Overman et al., 2014), on PTU-  
448 treated 4dpf old embryos, which were anesthetized in 0.1% MS-222 and fixed in 4%  
449 PFA overnight. Embryos were positioned on their back in 70% glycerol in PBS and  
450 imaged with Leica M165 FC stereomicroscope (Leica Microsystems, Wetzlar,  
451 Germany. Analysis was performed in ImageJ. *In vivo* high-speed brightfield imaging  
452 of the embryonic hearts from PTU-treated embryos at 5dpf, which were anesthetized  
453 in 0.1% MS-222 and embedded in 0.3% UltraPure agarose (Thermo Fisher  
454 Scientific, Waltham, MA, USA) prepared in E3 medium containing 16 mg/ml MS-222.  
455 Measurements were performed at 28°C using a Leica DM IRBE inverted light  
456 microscope (Leica Microsystems) with a Hamamatsu C9300-221 high-speed CCD  
457 camera (Hamamatsu Photonics, Hamamatsu, Japan). Imaging was conducted at  
458 150 frames per seconds (fps) using Hokawo 2.1 imaging software (Hamamatsu  
459 Photonics) for a period of 10 seconds (approximately 30 cardiac cycles). Heart rate  
460 measurements and contractility parameters were analysed using ImageJ. Volumes  
461 were analysed using ImageJ by drawing an ellipse on top of the ventricle at end-  
462 diastole and end-systole. Averages of three measurements per heart were  
463 determined. End diastolic and end systolic volume (EDV/ESV) were calculated by:  
464  $(4/3) * (\pi) * (\text{major axis}/2) * ((\text{minor axis}/2)^2)$ . Stroke volume (SV) by: EDV-ESV.  
465 Ejection fraction (EF) by:  $(\text{SV}/\text{EDV}) * 100$ . Cardiac output (CO) by:  $\text{SV} * \text{Heart rate}$ .

## 466 **Whole mount *in situ* hybridization**

467 PTU-treated embryos were anesthetized in 0.1% MS-222 (Sigma Aldrich, Ref:  
468 A5040) and fixed in 4% PFA for at least 12h at 4°C. *WISH* was performed as  
469 described in (Thisse et al., 1993). Probes specific for *myl7*, *vhm*c and *ahm*c were  
470 described in (Bonetti et al., 2014). Probes specific for *c-myb*, *l-plastin*, *pu.1*, *gata1*,  
471 *ikaros*, *b-globin* and *alas-2* were described in (Choorapoikayil et al., 2014; Hu et al.,  
472 2014). Subsequently, embryos were mounted in 70% glycerol in PBS and imaged  
473 with Leica M165 FC stereomicroscope (Leica Microsystems). Images were  
474 processed in ImageJ (U. S. National Institutes of Health, Bethesda, MD, USA).  
475 Abundance of the probe signal was scored as low, mild or high.

## 476 **Inhibitors treatment**

477 PTU-treated embryos were incubated with either 0.15 $\mu$ M of CI1040 (Sigma Aldrich,  
478 Ref: PZ0181), 4 $\mu$ M LY294002 (Sigma Aldrich, Ref: L9908) or 10 $\mu$ M of  
479 Dexamethasone (Sigma Aldrich, Ref: D4902) continuously from 24hpf until 5dpf. At  
480 5dpf embryos were fixed and half of the embryos was processed for WISH using  
481 probe specific for *c-myb* and the other half using probe specific for *l-plastin*. Images  
482 were processed in ImageJ. Abundance of the probe signal was scored as low, mild  
483 or high.

#### 484 **Confocal microscopy**

485 All confocal imaging was performed on a Leica SP8 confocal microscope (Leica  
486 Microsystems). Embryos were mounted in 0.3% agarose. Live embryos were  
487 anesthetized in MS-222. Whole embryos were imaged using a 10X objective and z-  
488 stack step size of 3 $\mu$ m, while the CHT area with 20X objective and z-stack step size  
489 of 1 $\mu$ m. The number of CD41-GFP<sup>low</sup> cells was determined by imaging the CHT of  
490 the living 5dpf old embryos of the Shp2<sup>wt</sup>, Shp2<sup>D61G/wt</sup> and Shp2<sup>D61G/D61G</sup> siblings in  
491 the Tg(*cd41:GFP, kdrl:mCherry-CAAX*) transgenic background, while the number of  
492 CD41-GFP<sup>high</sup> cells was determined by imaging whole embryos, which were fixed for  
493 2h in 4% PFA prior to imaging. To determine the number of mpx-GFP and mpeg-  
494 mCherry cells, whole live 5dpf old embryos of the Shp2<sup>wt</sup>, Shp2<sup>D61G/wt</sup> and  
495 Shp2<sup>D61G/D61G</sup> line in the Tg(*mpx:GFP, mpeg:mCherry*) transgenic background were  
496 imaged. Imaris V9.3.1 (Bitplane, Zurich, Switzerland) was used to reconstruct 3D  
497 images and count individual GFP and/or mCherry positive cells.

#### 498 **Phosphorylated Histone 3 (pHis3) staining**

499 PTU-treated 5dpf old Shp2<sup>D61G</sup> embryos in the Tg(*cd41:GFP, kdrl:mCherry-CAAX*)  
500 transgenic background were fixed in 2% PFA overnight and stained as described in  
501 (Choorapoikayil et al., 2012). Primary pHis3 antibody (1:500 in blocking buffer,  
502 Abcam, Cambridge, UK, Ref: ab5176) and secondary GFP antibody (1:200 in  
503 blocking buffer, Aves Labs Inc. Tigard, OR, USA, GFP-1010) were used. Embryos  
504 were mounted in 0.3% agarose, their CHT was imaged using the SP8 confocal  
505 microscope and 3D images were subsequently reconstructed using Imaris.

#### 506 **Acridine orange staining**

507 PTU-treated embryos at 5dpf were incubated in 5 $\mu$ g/ml of Acridine orange (Sigma  
508 Aldrich, Ref: A6014) in E3 medium, for 20 minutes at room temperature. They were  
509 then washed 5 times for 5 minutes in E3 medium, anesthetized in MS-222 and

510 mounted in 0.3% agarose. Whole embryos were imaged with SP8 confocal  
511 microscope and 3D images were reconstructed using Imaris.

### 512 **Colony forming assay**

513 The CD41-GFP<sup>low</sup> cell population isolated from CHTs of Shp2<sup>wt</sup>, Shp2<sup>D61G/wt</sup> embryos  
514 at 5dpf was FACS sorted. 250 µl of solution containing 2 500 cells, media prepared  
515 as described in (Svoboda et al., 2016), and 100 ng/ml of granulocyte colony  
516 stimulating factor a (Gscfa, gift from the Petr Bartunek lab, Institute of Molecular  
517 Genetics, Academy of Sciences of the Czech Republic v.v.i. Prague) was plated per  
518 well of a 96 well plate in a triplicate. Cells were grown in humidified incubators at  
519 32°C, 5% CO<sub>2</sub>. After 6 days colonies were imaged and counted using the EVOS  
520 microscope (Thermo Fisher Scientific).

### 521 **Transplantation experiments**

522 Zebrafish kidney marrow transplantation were performed as previously described  
523 (Moore et al., 2016; Tang et al., 2014). In short, tissues were isolated from donor  
524 Shp2<sup>D61G/wt</sup> or wild type animals in the Tg(*mpx:GFP*, *mpeg:mCherry*) background  
525 following Tricaine (Western Chemical, Brussels, Belgium) overdose. Excised tissues  
526 from dissected fish are placed into 500 µl of 0.9x PBS + 5% FBS on a 10-cm Petri  
527 dish. Single-cell suspensions were obtained by maceration with a razor blade,  
528 followed by manual pipetting to disassociate cell clumps. Cells were filtered through  
529 a 40-µm Falcon cell strainer, centrifuged at 1,000 g for 10 min, and resuspended to  
530 the 2 x 10<sup>7</sup> cells/ml. 5-µl suspension containing 10<sup>5</sup> kidney marrow cells were  
531 injected into the peritoneal cavity of each recipient fish using a 26s Hamilton 80366  
532 syringe. Cellular engraftment was assessed at 0, 7, 14, 28 dpt by epifluorescence  
533 microscopy.

### 534 **Isolation of CD41-GFP<sup>low</sup> cell population and single-cell RNA sequencing**

535 From 24hpf onwards embryos were grown in PTU-containing medium. The CHTs of  
536 approximately 50 Shp2<sup>wt</sup>, Shp2<sup>D61G/wt</sup> and Shp2<sup>D61G/D61G</sup> embryos in Tg(*cd41:GFP*,  
537 *kdrl:mCherry-CAAX*) transgenic background at 5dpf were dissected and collected in  
538 Leibovitz-medium (Thermo Fisher Scientific, Gibco, Ref: 11415049). After washing  
539 with PBS0 the CHTs were dissociated with TrypLE (Thermo Fisher Scientific, Gibco,  
540 Ref: 12605036) for 45 minutes at 32°C. The resulting cell suspension was washed  
541 with PBS0, resuspended in PBS0 supplemented with 2mM EDTA, 2% FCS and  
542 0.5µg/ml DAPI (Sigma Aldrich, Ref: D9542) and passed through a 40µm Falcon cell



543 strainer. DAPI staining was used to exclude dead cells. Cells with CD41-GFP<sup>low</sup>  
544 positive signal were subjected to fluorescence-activated cell sorting (FACS) with an  
545 influx cytometer (BD Biosciences, San Jose, CA, USA). Single-cell RNA sequencing  
546 was performed according to an adapted version of the SORT-seq (Muraro et al.,  
547 2016) with adapted primers described in (Van Den Brink et al., 2017). In short, single  
548 cells were FACS sorted, as described above, on 384-well plates containing 384  
549 primers and Mineral oil (Sigma Aldrich). After sorting, plates were snap-frozen on dry  
550 ice and stored at -80°C. For amplification cells were heat-lysed at 65°C followed by  
551 cDNA synthesis using the CEL-seq2 (Hashimshony et al., 2016) and robotic liquid  
552 handling platforms. After the second strand cDNA synthesis, the barcoded material  
553 was pooled into libraries of 384 cells and amplified using *in vitro* transcription.  
554 Following amplification, the rest of the CEL-seq2 protocol was followed for  
555 preparation of the amplified cDNA library, using TruSeq small RNA primers (Illumina,  
556 San Diego, CA, USA). The DNA library was paired-end sequenced on an Illumina  
557 Nextseq™ 500 (Illumina), high output, with a 1x75 bp Illumina kit (R1:26 cycles,  
558 index read: 6 cycles, R2:60 cycles).

### 559 **Data analysis of single-cell RNA sequencing**

560 During sequencing, Read1 was assigned 26 base pairs and was used for  
561 identification of the Illumina library barcode, cell barcode and unique molecular  
562 identifier. Read2 was assigned 60 base pairs and used to map to the reference  
563 transcriptome of Zv9 *Danio rerio*. Data was demultiplexed as described in (Grün et  
564 al., 2014). Single cell transcriptomics analysis was done using the RaceID3  
565 algorithm (Herman et al., 2018), following an adapted version of the RaceID manual  
566 (<https://cran.r-project.org/web/packages/RaceID/vignettes/RaceID.html>) using R-  
567 3.5.2. In total 768 cells per genotype were sequenced for the datasets. After  
568 removing cells with less than 1000 UMIs and only keeping genes that were detected  
569 with at least 3 UMIs in 1 cell, 439 wt, 384 D61G/wt and 543 D61G/D61G cells were  
570 left for further analysis. Batch effects observed for plates which were prepared on  
571 different days was removed using the *scrn* function. 4 major clusters and 5 minor  
572 clusters were identified. The minor clusters contained 130 cells in total and were  
573 excluded from further analysis for statistical reasons. Differential gene expression  
574 analysis was done as described in (Muraro et al., 2016) with an adapted version of  
575 the DESseq2 (Love et al., 2014). GO term enrichment analysis for differentially

576 expressed genes of each major cluster was performed using the DAVID  
577 Bioinformatics Resources 6.8 (<https://david.ncifcrf.gov/>).

## 578 **RNA sequencing and differential gene expression analysis of the patient**

### 579 **material**

580 Libraries were prepared with TruSeq® Stranded Total RNASample preparation kit  
581 (Illumina) according to supplier's recommendations. Briefly, the ribosomal RNA  
582 fraction was removed from 1µg of total RNA using the Ribo-Zero™ Gold Kit (Illumina).  
583 Fragmentation was then achieved using divalent cations under elevated temperature  
584 to obtain approximately 300bp pieces. Double strand cDNA synthesis was performed  
585 using reverse transcriptase and random primers, Illumina adapters were ligated and  
586 cDNA library was PCR amplified for sequencing. Paired-end 75b sequencing was then  
587 carried out on a HiSeq4000 (Illumina). Quality of reads was assessed for each sample  
588 using FastQC (<http://www.bioinformatics.babraham.ac.uk/projects/fastqc/>). A subset  
589 of 500,000 reads from each Fastq file was aligned to the reference human genome  
590 hg19/GRCh37 with tophat2 to determine insert sizes with Picard. Full Fastq files were  
591 aligned to the reference human genome hg19/GRCh37 with tophat2 (-p 24 -r 150 -g 2  
592 --library-type fr-firststrand) (Kim et al., 2013). We removed reads mapping to multiple  
593 locations. STAR was used to obtain the number of reads associated with each gene  
594 in the Gencode v26lift37 annotation (restricted to protein-coding genes, antisense, and  
595 lincRNAs). Raw counts for each sample were imported into R statistical software using  
596 the Bioconductor DESeq2 package. Extracted count matrix was normalized for library  
597 size and coding length of genes to compute TPM expression levels. Differential gene  
598 expression analysis was performed using the Bioconductor limma package and the  
599 voom transformation. To improve the statistical power of the analysis, only genes  
600 expressed in at least one sample (TPM >0.3) were considered. A qval threshold of <  
601 0.05 and a minimum fold change of 1.2 were used to define differentially expressed  
602 genes. Due to the imbalance between male and female samples, sex differences were  
603 adjusted with the function model.matrix from the stats package. RNAseq data analysis  
604 was performed with Galileo® v1.4.4, an interactive R shiny application.  
605 Representations of the gene expression levels were performed with the library ggplot2  
606 and R 4.0.2.

### 607 **Pathway enrichment analysis (GSEA) and Principal component analysis (PCA)**

608 Gene set enrichment analysis was performed by clusterProfiler::GSEA function using  
609 the fgsea algorithm. Gene list from the differential analysis was ordered by decreasing

610 log<sub>2</sub> (fold change). Hallmark classes Gene sets from the MSigDB v7.2 database were  
611 selected keeping only gene sets defined by 10-500 genes. The p-values were adjusted  
612 by the Benjamini-Hochberg (FDR) procedure. The custom zebrafish signature was  
613 built from the human orthologous genes of the 100 most overexpressed zebrafish  
614 genes based on the log<sub>2</sub> (Fold Change) derived from the monocyte/macrophage  
615 progenitor cluster of the zebrafish HSPCs single cell sequencing dataset. The  
616 Bioconductor edgeR package was used to import raw counts into R, and compute  
617 normalized log<sub>2</sub> CPM (counts per millions of mapped reads) using the TMM (weighted  
618 trimmed mean of M-values) as normalization procedure. The normalized expression  
619 matrix from the 100 most overexpressed genes (based on log<sub>2</sub>FC in the zebrafish  
620 dataset) was used to classify the samples according to their gene expression patterns  
621 using principal component analysis (PCA). PCA was performed by FactoMineR::PCA  
622 function with “ncp = 10, scale.unit = FALSE” parameters.

### 623 **Statistical analysis**

624 Data was plotted in GraphPad Prism 7.05 (GraphPad Software Inc., San Diego, CA,  
625 USA), except for the violin plots of gene expression, which were plotted in R using  
626 ggplot2(Wickham, 2009). Statistical difference analysis was performed using the  
627 one-way ANOVA supplemented by Tukey’s HSD test in GraphPad Prism 7.05,  
628 except for the gene expression differences in single cell RNA sequencing data,  
629 where T-test was performed in Rstudio 1.1.463 (Rstudio, Boston, MA, USA), and the  
630 treatment WISH experiments, where Chi-squared test was performed in GraphPad  
631 Prism 7.05. Significant difference was considered when  $p < 0.05$  (\* $p < 0.05$ , \*\* $p < 0.01$ ,  
632 \*\*\* $p < 0.001$ , NS=non significant).

## 633 **Author Contributions**

634 **MS** Conceptualization, Methodology, Formal analysis, Investigation, Data Curation,  
635 Writing - Original Draft, Visualization, **SBF** Investigation, Formal analysis, Data  
636 Curation, Methodology, Writing - Review & Editing, **FP** Investigation, Formal  
637 Analysis, Methodology, Writing - Review Editing, **CY, QY** Investigation- performed  
638 transplantation experiments, Data Curation, Formal analysis, Methodology, Writing -  
639 Review & Editing, **MS** Investigation, Formal Analysis, Methodology, **SMK**  
640 Investigation- provided assistance with heart function analysis, Methodology,  
641 Resources, Writing - Review & Editing, **JB** Conceptualization, Supervision, Writing -  
642 Review & Editing, **DML** Conceptualization, Supervision, Writing - Review & Editing,  
643 **HC** Conceptualization, Supervision, Writing - Review & Editing, **JDH**  
644 Conceptualization, Supervision, Funding acquisition, Project administration, Writing -  
645 Original Draft

## 646 **Acknowledgements**

647 We thank the laboratory of Niels Geijsen (Hubrecht Institute) for providing us with  
648 Cas9 protein, Petr Bartunek and Olga Machanova (Institute of Molecular Genetics,  
649 Academy of Sciences of the Czech Republic v.v.i. Prague) and Geert Wiegertjes  
650 (University Wageningen) for cytokines and carp serum, Stefan van der Elst for  
651 assistance with FACS sorting, Hubrecht Institute animal caretakers for animal  
652 support and Single Cell Discoveries and Chloé Baron for support with single cell  
653 RNA sequencing. This work was supported by E-Rare grant NSEuroNet (JdH and  
654 HC), EJPRD grant NSEuroNet (JdH and HC), NIH grants R01CA211734 (D.M.L.)  
655 and R24OD016761 (D.M.L.), the MGH Research Scholar Award (D.M.L.) and Alex  
656 Lemonade Stand Foundation (C.Y.).

## 657 **Competing Interests:**

658 The authors declare no competing interests.

## 659 **References**

- 660 Aleström, P., D'Angelo, L., Midtlyng, P. J., Schorderet, D. F., Schulte-Merker, S.,  
661 Sohm, F., & Warner, S. (2020). Zebrafish: Housing and husbandry  
662 recommendations. *Laboratory Animals*, *54*(3), 213–224.  
663 <https://doi.org/10.1177/0023677219869037>
- 664 Araki, T., Chan, G., Newbigging, S., Morikawa, L., Bronson, R., & Neel, B. G. (2009).  
665 Noonan syndrome cardiac defects are caused by PTPN11 acting in  
666 endocardium to enhance endocardial-mesenchymal transformation.  
667 *Proceedings of the National Academy of Sciences of the United States of*  
668 *America*, *106*(12), 4736–4741. <https://doi.org/10.1073/pnas.0810053106>
- 669 Araki, T., Mohi, M. G., Ismat, F. A., Bronson, R. T., Williams, I. R., Kutok, J. L., Yang,  
670 W., Pao, L. I., Gilliland, D. G., Epstein, J. A., & Neel, B. G. (2004). Mouse model  
671 of Noonan syndrome reveals cell type- and gene dosage-dependent effects of  
672 Ptpn11 mutation. *Nature Medicine*, *10*(8), 849–857.  
673 <https://doi.org/10.1038/nm1084>
- 674 Arranz, L., Arriero, M. del M., & Villatoro, A. (2017). Interleukin-1 $\beta$  as emerging  
675 therapeutic target in hematological malignancies and potentially in their  
676 complications. In *Blood Reviews* (Vol. 31, Issue 5, pp. 306–317). Churchill  
677 Livingstone. <https://doi.org/10.1016/j.blre.2017.05.001>
- 678 Bagby, G. C., Dinarello, C. A., Neerhout, R. C., Ridgway, D., & McCall, E. (1988).  
679 Interleukin 1-dependent paracrine granulopoiesis in chronic granulocytic  
680 leukemia of the juvenile type. *Journal of Clinical Investigation*, *82*(4), 1430–  
681 1436. <https://doi.org/10.1172/JCI113748>
- 682 Behnert, A., Meyer, J., Parsa, J.-Y., Hechmer, A., Loh, M. L., Olshen, A., Smith, A. J.  
683 de, & Stieglitz, E. (2021). Exploring the genetic and epigenetic origins of juvenile  
684 myelomonocytic leukemia using newborn screening samples. *Leukemia* *2021*,  
685 1–4. <https://doi.org/10.1038/s41375-021-01331-0>
- 686 Bonetti, M., Rodriguez-Martinez, V., Overman, J. P., Overvoorde, J., Van Eekelen,  
687 M., Jopling, C., & Den Hertog, J. (2014). Distinct and overlapping functions of  
688 ptpn11 genes in zebrafish development. *PLoS ONE*, *9*(4), e94884.  
689 <https://doi.org/10.1371/journal.pone.0094884>
- 690 Caye, A., Rouault-Pierre, K., Strullu, M., Lainey, E., Abarrategi, A., Fenneteau, O.,  
691 Arfeuille, C., Osman, J., Cassinat, B., Pereira, S., Anjos-Afonso, F., Currie, E.,

- 692 Ariza-McNaughton, L., Barlogis, V., Dalle, J. H., Baruchel, A., Chomienne, C.,  
693 Cavé, H., & Bonnet, D. (2019). Despite mutation acquisition in hematopoietic  
694 stem cells, JMML-propagating cells are not always restricted to this  
695 compartment. *Leukemia*, 1–11. <https://doi.org/10.1038/s41375-019-0662-y>
- 696 Caye, A., Strullu, M., Guidez, F., Cassinat, B., Gazal, S., Fenneteau, O., Lainey, E.,  
697 Nouri, K., Nakhaei-Rad, S., Dvorsky, R., Lachenaud, J., Pereira, S., Vivent, J.,  
698 Verger, E., Vidaud, D., Galambrun, C., Picard, C., Petit, A., Contet, A., ... Cavé,  
699 H. (2015). Juvenile myelomonocytic leukemia displays mutations in components  
700 of the RAS pathway and the PRC2 network. *Nature Genetics* 2015 47:11,  
701 47(11), 1334–1340. <https://doi.org/10.1038/ng.3420>
- 702 Chan, G., Kalaitzidis, D., Usenko, T., Kutok, J. L., Yang, W., Mohi, M. G., & Neel, B.  
703 G. (2009). Leukemogenic Ptpn11 causes fatal myeloproliferative disorder via  
704 cell-autonomous effects on multiple stages of hematopoiesis. *Blood*, 113(18),  
705 4414–4424. <https://doi.org/10.1182/BLOOD-2008-10-182626>
- 706 Choorapoikayil, S., Kers, R., Herbolmel, P., Kissa, K., & den Hertog, J. (2014).  
707 Pivotal role of Pten in the balance between proliferation and differentiation of  
708 hematopoietic stem cells in zebrafish. *Blood*, 123(2), 184–190.  
709 <https://doi.org/10.1182/BLOOD-2013-05-501544>
- 710 Choorapoikayil, S., Kuiper, R. V, de Bruin, A., & den Hertog, J. (2012).  
711 Haploinsufficiency of the genes encoding the tumor suppressor Pten  
712 predisposes zebrafish to hemangiosarcoma. *Disease Models & Mechanisms*,  
713 5(2), 241–247. <https://doi.org/10.1242/dmm.008326>
- 714 Craver, B. M., El Alaoui, K., Scherber, R. M., & Fleischman, A. G. (2018). The critical  
715 role of inflammation in the pathogenesis and progression of myeloid  
716 malignancies. In *Cancers* (Vol. 10, Issue 4). MDPI AG.  
717 <https://doi.org/10.3390/cancers10040104>
- 718 de Pater, E., & Trompouki, E. (2018). Bloody Zebrafish: Novel Methods in Normal  
719 and Malignant Hematopoiesis. *Frontiers in Cell and Developmental Biology*, 6,  
720 124. <https://doi.org/10.3389/fcell.2018.00124>
- 721 Dong, L., Yu, W. M., Zheng, H., Loh, M. L., Bunting, S. T., Pauly, M., Huang, G.,  
722 Zhou, M., Broxmeyer, H. E., Scadden, D. T., & Qu, C. K. (2016).  
723 Leukaemogenic effects of Ptpn11 activating mutations in the stem cell  
724 microenvironment. *Nature*, 539(7628), 304–308.  
725 <https://doi.org/10.1038/nature20131>

- 726 Ehrchen, J. M., Roth, J., & Barczyk-Kahlert, K. (2019). More Than Suppression:  
727 Glucocorticoid Action on Monocytes and Macrophages. *Frontiers in*  
728 *Immunology*, 0(AUG), 2028. <https://doi.org/10.3389/FIMMU.2019.02028>
- 729 Ellett, F., Pase, L., Hayman, J. W., Andrianopoulos, A., & Lieschke, G. J. (2011).  
730 mpeg1 promoter transgenes direct macrophage-lineage expression in zebrafish.  
731 *Blood*, 117(4), e49. <https://doi.org/10.1182/blood-2010-10-314120>
- 732 Freedman, M. H., Cohen, A., Grunberger, T., Bunin, N., Luddy, R. E., Saunders, E.  
733 F., Shahidi, N., Lau, A., & Estrov, Z. (1992). Central role of tumour necrosis  
734 factor, GM-CSF, and interleukin 1 in the pathogenesis of juvenile chronic  
735 myelogenous leukaemia. *British Journal of Haematology*, 80(1), 40–48.  
736 <https://doi.org/10.1111/j.1365-2141.1992.tb06398.x>
- 737 Gagnon, J. A., Valen, E., Thyme, S. B., Huang, P., Akhmetova, L., Akhmetova, L.,  
738 Pauli, A., Montague, T. G., Zimmerman, S., Richter, C., & Schier, A. F. (2014).  
739 Efficient mutagenesis by Cas9 protein-mediated oligonucleotide insertion and  
740 large-scale assessment of single-guide RNAs. *PloS One*, 9(5), e98186.  
741 <https://doi.org/10.1371/journal.pone.0098186>
- 742 Gore, A. V., Pillay, L. M., Venero Galanternik, M., & Weinstein, B. M. (2018). The  
743 zebrafish: A fintastic model for hematopoietic development and disease. *Wiley*  
744 *Interdisciplinary Reviews: Developmental Biology*, 7(3), e312.  
745 <https://doi.org/10.1002/wdev.312>
- 746 Grün, D., Kester, L., & Van Oudenaarden, A. (2014). Validation of noise models for  
747 single-cell transcriptomics. *Nature Methods*, 11(6), 637–640.  
748 <https://doi.org/10.1038/nmeth.2930>
- 749 Hale, A. J., & den Hertog, J. (2017). Shp2–Mitogen-Activated Protein Kinase  
750 Signaling Drives Proliferation during Zebrafish Embryo Caudal Fin Fold  
751 Regeneration. *Molecular and Cellular Biology*, 38(4).  
752 <https://doi.org/10.1128/mcb.00515-17>
- 753 Hashimshony, T., Senderovich, N., Avital, G., Klochendler, A., de Leeuw, Y., Anavy,  
754 L., Gennert, D., Li, S., Livak, K. J., Rozenblatt-Rosen, O., Dor, Y., Regev, A., &  
755 Yanai, I. (2016). CEL-Seq2: Sensitive highly-multiplexed single-cell RNA-Seq.  
756 *Genome Biology*, 17(1), 77. <https://doi.org/10.1186/s13059-016-0938-8>
- 757 Herman, J. S., Sagar, & Grün, D. (2018). FateID infers cell fate bias in multipotent  
758 progenitors from single-cell RNA-seq data. *Nature Methods*, 15(5), 379–386.  
759 <https://doi.org/10.1038/nmeth.4662>

- 760 Hogan, B. M., Bos, F. L., Bussmann, J., Witte, M., Chi, N. C., Duckers, H. J., &  
761 Schulte-Merker, S. (2009). *Ccbe1* is required for embryonic lymphangiogenesis  
762 and venous sprouting. *Nature Genetics*, *41*(4), 396–398.  
763 <https://doi.org/10.1038/ng.321>
- 764 Hu, B., Zhang, W., Feng, X., Ji, W., Xie, X., & Xiao, W. (2014). Zebrafish *eaf1*  
765 suppresses *foxo3b* expression to modulate transcriptional activity of *gata1* and  
766 *spi1* in primitive hematopoiesis. *Developmental Biology*, *388*(1), 81–93.  
767 <https://doi.org/10.1016/j.ydbio.2014.01.005>
- 768 Jopling, C., Van Geemen, D., & Den Hertog, J. (2007). *Shp2* knockdown and  
769 noonan/LEOPARD mutant *Shp2*-induced gastrulation defects. *PLoS Genetics*,  
770 *3*(12), e225. <https://doi.org/10.1371/journal.pgen.0030225>
- 771 Kratz, C. P., Niemeyer, C. M., Castleberry, R. P., Cetin, M., Bergsträsser, E.,  
772 Emanuel, P. D., Hasle, H., Kardos, G., Klein, C., Kojima, S., Stary, J., Trebo, M.,  
773 Zecca, M., Gelb, B. D., Tartaglia, M., & Loh, M. L. (2005). The mutational  
774 spectrum of *PTPN11* in juvenile myelomonocytic leukemia and Noonan  
775 syndrome/myeloproliferative disease. *Blood*, *106*(6), 2183–2185.  
776 <https://doi.org/10.1182/blood-2005-02-0531>
- 777 Lin, H. F., Traver, D., Zhu, H., Dooley, K., Paw, B. H., Zon, L. I., & Handin, R. I.  
778 (2005). Analysis of thrombocyte development in CD41-GFP transgenic  
779 zebrafish. *Blood*, *106*(12), 3803–3810. [https://doi.org/10.1182/blood-2005-01-](https://doi.org/10.1182/blood-2005-01-0179)  
780 [0179](https://doi.org/10.1182/blood-2005-01-0179)
- 781 Louka, E., Povinelli, B., Rodriguez-Meira, A., Buck, G., Wen, W. X., Wang, G.,  
782 Sousos, N., Ashley, N., Hamblin, A., Booth, C. A. G., Roy, A., Elliott, N.,  
783 Iskander, D., De La Fuente, J., Fordham, N., O’Byrne, S., Inglott, S., Norfo, R.,  
784 Salio, M., ... Mead, A. J. (2021). Heterogeneous disease-propagating stem cells  
785 in juvenile myelomonocytic leukemia. *Journal of Experimental Medicine*, *218*(2).  
786 <https://doi.org/10.1084/JEM.20180853>
- 787 Love, M. I., Huber, W., & Anders, S. (2014). Moderated estimation of fold change  
788 and dispersion for RNA-seq data with DESeq2. *Genome Biology*, *15*(12), 550.  
789 <https://doi.org/10.1186/s13059-014-0550-8>
- 790 Moore, J. C., Tang, Q., Yordán, N. T., Moore, F. E., Garcia, E. G., Lobbardi, R.,  
791 Ramakrishnan, A., Marvin, D. L., Anselmo, A., Sadreyev, R. I., & Langenau, D.  
792 M. (2016). Single-cell imaging of normal and malignant cell engraftment into  
793 optically clear *prkdc*-null *scid* zebrafish. *Journal of Experimental Medicine*,



- 794 213(12), 2575–2589. <https://doi.org/10.1084/jem.20160378>
- 795 Mulero-Navarro, S., Sevilla, A., Roman, A. C., Lee, D.-F., D'Souza, S. L., Pardo, S.,  
796 Riess, I., Su, J., Cohen, N., Schaniel, C., Rodriguez, N. A., Baccarini, A., Brown,  
797 B. D., Cavé, H., Caye, A., Strullu, M., Yalcin, S., Park, C. Y., Dhandapany, P. S.,  
798 ... Gelb, B. D. (2015). Myeloid Dysregulation in a Human Induced Pluripotent  
799 Stem Cell Model of PTPN11 -Associated Juvenile Myelomonocytic Leukemia.  
800 *Cell Reports*, 13(3), 504–515. <https://doi.org/10.1016/j.celrep.2015.09.019>
- 801 Muraro, M. J., Dharmadhikari, G., Grün, D., Groen, N., Dielen, T., Jansen, E., van  
802 Gulp, L., Engelse, M. A., Carlotti, F., de Koning, E. J. P., & van Oudenaarden,  
803 A. (2016). A Single-Cell Transcriptome Atlas of the Human Pancreas. *Cell*  
804 *Systems*, 3(4), 385-394.e3. <https://doi.org/10.1016/j.cels.2016.09.002>
- 805 Niihori, T., Nagai, K., Fujita, A., Ohashi, H., Okamoto, N., Okada, S., Harada, A.,  
806 Kihara, H., Arbogast, T., Funayama, R., Shiota, M., Nakayama, K., Abe, T.,  
807 Inoue, S. ichi, Tsai, I. C., Matsumoto, N., Davis, E. E., Katsanis, N., & Aoki, Y.  
808 (2019). Germline-Activating RRAS2 Mutations Cause Noonan Syndrome.  
809 *American Journal of Human Genetics*, 104(6), 1233–1240.  
810 <https://doi.org/10.1016/j.ajhg.2019.04.014>
- 811 Ogryzko, N. V., Lewis, A., Wilson, H. L., Meijer, A. H., Renshaw, S. A., & Elks, P. M.  
812 (2019). Hif-1 $\alpha$ -Induced Expression of Il-1 $\beta$  Protects against Mycobacterial  
813 Infection in Zebrafish. *The Journal of Immunology*, 202(2), 494–502.  
814 <https://doi.org/10.4049/JIMMUNOL.1801139>
- 815 Paardekooper Overman, J., Yi, J.-S., Bonetti, M., Soulsby, M., Preisinger, C.,  
816 Stokes, M. P., Hui, L., Silva, J. C., Overvoorde, J., Giansanti, P., Heck, A. J. R.,  
817 Kontaridis, M. I., Den Hertog, J., & Bennett, A. M. (2014). PZR Coordinates  
818 Shp2 Noonan and LEOPARD Syndrome Signaling in Zebrafish and Mice.  
819 *Molecular and Cellular Biology*, 34(15), 2874–2889.  
820 <https://doi.org/10.1128/MCB.00135-14>
- 821 Rauen, K. A. (2013). The RASopathies. *Annu. Rev. Genomics Hum. Genet*, 14,  
822 355–369. <https://doi.org/10.1146/annurev-genom-091212-153523>
- 823 Renshaw, S. A., Loynes, C. A., Trushell, D. M. I., Elworthy, S., Ingham, P. W., &  
824 Whyte, M. K. B. (2006). A transgenic zebrafish model of neutrophilic  
825 inflammation. *Blood*, 108(13), 3976–3978. [https://doi.org/10.1182/blood-2006-](https://doi.org/10.1182/blood-2006-05-024075)  
826 05-024075
- 827 Runtuwene, V., van Eekelen, M., Overvoorde, J., Rehmann, H., Yntema, H. G.,

- 828 Nillesen, W. M., van Haeringen, A., van der Burgt, I., Burgering, B., & den  
829 Hertog, J. (2011). Noonan syndrome gain-of-function mutations in NRAS cause  
830 zebrafish gastrulation defects. *Disease Models & Mechanisms*, *4*(3), 393–399.  
831 <https://doi.org/10.1242/dmm.007112>
- 832 Strullu, M., Caye, A., Lachenaud, J., Cassinat, B., Gazal, S., Fenneteau, O.,  
833 Pouvreau, N., Pereira, S., Baumann, C., Contet, A., Sirvent, N., Méchinaud, F.,  
834 Guellec, I., Adjaoud, D., Paillard, C., Alberti, C., Zenker, M., Chomienne, C.,  
835 Bertrand, Y., ... Cavé, H. (2014). Juvenile myelomonocytic leukaemia and  
836 Noonan syndrome. *Journal of Medical Genetics*, *51*(10), 689–697.  
837 <https://doi.org/10.1136/jmedgenet-2014-102611>
- 838 Svoboda, O., Stachura, D. L., MacHonova, O., Zon, L. I., Traver, D., & Bartunek, P.  
839 (2016). Ex vivo tools for the clonal analysis of zebrafish hematopoiesis. *Nature*  
840 *Protocols*, *11*(5), 1007–1020. <https://doi.org/10.1038/nprot.2016.053>
- 841 Tajan, M., de Rocca Serra, A., Valet, P., Edouard, T., & Yart, A. (2015). SHP2 sails  
842 from physiology to pathology. In *European Journal of Medical Genetics* (Vol. 58,  
843 Issue 10, pp. 509–525). <https://doi.org/10.1016/j.ejmg.2015.08.005>
- 844 Tajan, M., Paccoud, R., Branka, S., Edouard, T., & Yart, A. (2018). The RASopathy  
845 Family: Consequences of Germline Activation of the RAS/MAPK Pathway.  
846 *Endocrine Reviews*, *39*(5), 676–700. <https://doi.org/10.1210/er.2017-00232>
- 847 Tang, Q., Abdelfattah, N. S., Blackburn, J. S., Moore, J. C., Martinez, S. A., Moore,  
848 F. E., Lobbardi, R., Tenente, I. M., Ignatius, M. S., Berman, J. N., Liwski, R. S.,  
849 Houvras, Y., & Langenau, D. M. (2014). Optimized cell transplantation using  
850 adult rag2 mutant zebrafish. *Nature Methods*, *11*(8), 821–824.  
851 <https://doi.org/10.1038/nmeth.3031>
- 852 Tarnawsky, S. P., Yoshimoto, M., Deng, L., Chan, R. J., & Yoder, M. C. (2017). Yolk  
853 Sac Erythromyeloid Progenitors Expressing Gain Of Function PTPN11 Have  
854 Functional Features Of JMML But Are Not Sufficient To Cause Disease In Mice.  
855 *Developmental Dynamics : An Official Publication of the American Association of*  
856 *Anatomists*, *246*(12), 1001. <https://doi.org/10.1002/DVDY.24598>
- 857 Tarnawsky, S. P., Yu, W.-M., Qu, C.-K., Chan, R. J., & Yoder, M. C. (2018).  
858 Hematopoietic-restricted Ptpn11E76K reveals indolent MPN progression in  
859 mice. *Oncotarget*, *9*(31), 21831. <https://doi.org/10.18632/ONCOTARGET.25073>
- 860 Tartaglia, M., Mehler, E. L., Goldberg, R., Zampino, G., Brunner, H. G., Kremer, H.,  
861 Van der Burgt, I., Crosby, A. H., Ion, A., Jeffery, S., Kalidas, K., Patton, M. A.,

- 862 Kucherlapati, R. S., & Gelb, B. D. (2001). Mutations in PTPN11, encoding the  
863 protein tyrosine phosphatase SHP-2, cause Noonan syndrome. *Nature*  
864 *Genetics*, 29(4), 465–468. <https://doi.org/10.1038/ng772>
- 865 Tartaglia, M., Niemeyer, C. M., Fragale, A., Song, X., Buechner, J., Jung, A., Hählen,  
866 K., Hasle, H., Licht, J. D., & Gelb, B. D. (2003). Somatic mutations in PTPN11 in  
867 juvenile myelomonocytic leukemia, myelodysplastic syndromes and acute  
868 myeloid leukemia. *Nature Genetics*, 34(2), 148–150.  
869 <https://doi.org/10.1038/ng1156>
- 870 Tessadori, F., Roessler, H. I., Savelberg, S. M. C., Chocron, S., Kamel, S. M.,  
871 Duran, K. J., Van Haelst, M. M., Van Haften, G., & Bakkers, J. (2018). Effective  
872 CRISPR/Cas9-based nucleotide editing in zebrafish to model human genetic  
873 cardiovascular disorders. *Disease Models and Mechanisms*, 11(10).  
874 <https://doi.org/10.1242/dmm.035469>
- 875 Tessadori, F., van Weerd, J. H., Burkhard, S. B., Verkerk, A. O., de Pater, E.,  
876 Boukens, B. J., Vink, A., Christoffels, V. M., & Bakkers, J. (2012). Identification  
877 and Functional Characterization of Cardiac Pacemaker Cells in Zebrafish. *PLoS*  
878 *ONE*, 7(10), e47644. <https://doi.org/10.1371/journal.pone.0047644>
- 879 Thisse, C., Thisse, B., Schilling, T. F., & Postlethwait, J. H. (1993). Structure of the  
880 zebrafish snail1 gene and its expression in wild-type, spadetail and no tail  
881 mutant embryos. *Development*, 119(4).
- 882 Van Den Brink, S. C., Sage, F., Vértessy, Á., Spanjaard, B., Peterson-Maduro, J.,  
883 Baron, C. S., Robin, C., & Van Oudenaarden, A. (2017). Single-cell sequencing  
884 reveals dissociation-induced gene expression in tissue subpopulations. In  
885 *Nature Methods* (Vol. 14, Issue 10, pp. 935–936). Nature Publishing Group.  
886 <https://doi.org/10.1038/nmeth.4437>
- 887 Westerfield, M. (2000). *The Zebrafish Book: A Guide for the Laboratory Use of*  
888 *Zebrafish (Danio Rerio)* (4th ed.). University of Oregon Press.
- 889 Wickham, H. (2009). *ggplot2: Elegant Graphics for Data Analysis*. Springer  
890 International Publishing. <https://ggplot2.tidyverse.org>.
- 891 Xu, D., Liu, X., Yu, W. M., Meyerson, H. J., Guo, C., Gerson, S. L., & Qu, C. K.  
892 (2011). Non-lineage/stage-restricted effects of a gain-of-function mutation in  
893 tyrosine phosphatase Ptpn11 (Shp2) on malignant transformation of  
894 hematopoietic cells. *Journal of Experimental Medicine*, 208(10), 1977–1988.  
895 <https://doi.org/10.1084/jem.20110450>
